# Supplementary material for: Identifying hotspots of land use cover change under socioeconomic and climate change scenarios in Mexico
Source: Springer Nature journal article supplement (doi:10.1007/s13280-018-1085-0), 2018-08-20
Supplement: 13280_2018_1085_MOESM1_ESM.pdf [file 13280_2018_1085_MOESM1_ESM.pdf]

***Ambio***

Electronic Supplementary Material

*This supplementary material has not been peer reviewed.*

Title: Identifying Hotspots of Land Use Cover Change Under Socioeconomic and Climate Change Scenarios in Mexico

**Table S1.** Inputs of the LUCC model.

| Biophysical                                                                    |                              |                                 |                                              | Socioeconomic                     |                  |                                              |                                                                  |
|--------------------------------------------------------------------------------|------------------------------|---------------------------------|----------------------------------------------|-----------------------------------|------------------|----------------------------------------------|------------------------------------------------------------------|
| Map                                                                            | Original scale or resolution | Year                            | Source                                       | Map                               | Scale-resolution | Year                                         | Source                                                           |
| Land use and land cover                                                        | 1:250,000                    | 1993<br>2002<br>2007            | INEGI (2001)<br>INEGI (2005)<br>INEGI (2008) | Roads (Highways)                  | 1:1,000,000      | 2008                                         | Digital Chart of the World (1985)                                |
| Altitude and slope                                                             | 1:100,000                    | -                               | INEGI (2000)                                 | Natural Protected Areas           | 1:400,000        | 2012                                         | CONANP (2012)                                                    |
| Soil classification                                                            | 1:250,000                    | -                               | INEGI (2002)                                 | Human settlements                 | 1:50,000         | 2005                                         | INEGI (2008)                                                     |
| Aridity Index<br>Potential<br>Evapotranspiration<br>Temperature<br>Seasonality | 30 arc sec                   | Current<br>2020<br>2050<br>2080 | Metzger et al. (2013)                        | Index of marginalization **       | Municipality     | 1995<br>2000<br>2005<br>2010                 | CONAPO (1995)<br>CONAPO (2000)<br>CONAPO (2005)<br>CONAPO (2010) |
|                                                                                |                              |                                 |                                              | Population and population density | Municipality     | 1993<br>2002<br>2007                         | INEGI, CONAPO, COLMEX (2006)                                     |
|                                                                                |                              |                                 |                                              |                                   | Municipality     | 2020<br>2050<br>2080                         | Mendoza-Ponce (2016)                                             |
| Rivers                                                                         | 1:400,000                    | Current                         | Maderey and Torres-Rouata (1990)             | Gross Domestic Product            | Municipality     | 1993<br>2002<br>2007<br>2020<br>2050<br>2080 | Mendoza-Ponce (2016)                                             |

\*\*Index of marginalization is a national index, which includes socioeconomic information related to income, health, housing and education. For more information about how the marginalization index was calculated see CONAPO (2011).

## References

- CONAPO, 1995. Índice de Marginación Municipal [online]. Available from [http://www.conapo.gob.mx/es/CONAPO/Indices\\_de\\_marginacion\\_1995](http://www.conapo.gob.mx/es/CONAPO/Indices_de_marginacion_1995). [Accesed 18 June 2013].
- CONAPO, 2000. Índice de Marginación [online]. Available from [http://www.conapo.gob.mx/es/CONAPO/Indices\\_de\\_marginacion\\_2000](http://www.conapo.gob.mx/es/CONAPO/Indices_de_marginacion_2000). [Accesed 12 June 2013].
- CONAPO, 2005. Índice de Marginación. Available from [http://www.conapo.gob.mx/es/CONAPO/Indices\\_de\\_marginacion\\_2000](http://www.conapo.gob.mx/es/CONAPO/Indices_de_marginacion_2000). [Accesed 12 June 2013].
- CONAPO, 2010. Índice de Marginación Municipal. Available from [http://www.conapo.gob.mx/es/CONAPO/Indices\\_de\\_Marginacion\\_2010\\_por\\_entidad\\_federativa\\_y\\_municipio](http://www.conapo.gob.mx/es/CONAPO/Indices_de_Marginacion_2010_por_entidad_federativa_y_municipio). [Accesed 12 June 2013], Mexico.
- CONAPO, 2011. Index of marginalization for Mexican states and municipalities. Consejo Nacional de Población (CONAPO), Mexico, p. 54 (in Spanish).
- Digital\_Chart\_of\_the\_world, 1985. Red de carreteras (1: 1000000). México.
- INEGI-CONAPO-COLMEX, 2006. Conciliación de cifras sobre la dinámica demográfica de México.
- INEGI, 2000. Modelo Digital de Elevación (grid 120m). <http://www.inegi.org.mx/geo/contenidos/datosrelieve/continental/descarga.aspx>. INEGI, Aguascalientes.
- INEGI, 2001. Conjunto de Datos Vectoriales de la Carta de Uso de Suelo y Vegetación, 1:250,000, (serie II). Instituto Nacional de Estadística, Geografía e Informática, Aguascalientes
- INEGI, 2002. Conjunto de Datos Edafológico Vectoriales (1:250,000). In: <http://www.inegi.org.mx/geo/contenidos/reclnat/edafologia/cartaedafologica.aspx> (Ed.). INEGI, Aguascalientes.
- INEGI, 2005. Conjunto de Datos Vectoriales de Uso del suelo y Vegetación, escala 1:250,000 (serie III) Instituto Nacional de Estadística, Geografía e Informática, Aguascalientes.
- INEGI, 2008. Conjunto de Datos Vectoriales de Uso del suelo y Vegetación, escala 1:250,000 (serie IV) (preliminar version). Instituto Nacional de Estadística, Geografía e Informática, Aguascalientes.
- Maderey, R., Torres-Ruata, C., 1990. Hidrografía e hidrometría. In: II, I.A.V. (Ed.), Atlas Nacional de México. Instituto de Geografía, UNAM, México, pp. 1:4,000,000.
- Mendoza-Ponce, A., 2016. Vulnerability of Biodiversity to Land Use Cover Change and Climate Change in Mexico. University of Edinburgh.
- Metzger, M., Bunce, R., Jongman, R., Sayre, R., Trabucco, A., Zomer, R., 2013. A high-resolution bioclimate map of the world: a unifying framework for global biodiversity research and monitoring. *Global Ecology and Biogeography* 22, 630-638.

**Table S2.** Relative Weights of Evidence on the 10 most significant variables per transition from natural covers to agriculture.

| Transition: | Temperate Forest to Agriculture |             |             | Variable:   | Aridity_index            |     |
|-------------|---------------------------------|-------------|-------------|-------------|--------------------------|-----|
|             |                                 | Possible    | Executed    | Weight      |                          |     |
| Range       | Transitions                     | Transitions | Coefficient | Contrast    | Significant?             |     |
| 0           | 5000                            | 153632      | 3753        | -0.30946906 | -0.51400345              | yes |
| 5000        | 10000                           | 159502      | 6195        | 0.16910379  | 0.34809976               | yes |
| 10000       | 15000                           | 19549       | 960         | 0.41441172  | 0.44599021               | yes |
| 15000       | 30000                           | 4081        | 204         | 0.43310678  | 0.43965913               | yes |
|             |                                 | 336764      | 11112       |             |                          |     |
|             |                                 |             |             |             |                          |     |
| Transition: | Temperate Forest to Agriculture |             |             | Variable:   | Protected_Areas_distance |     |
|             |                                 | Possible    | Executed    | Weight      |                          |     |
| Range       | Transitions                     | Transitions | Coefficient | Contrast    | Significant?             |     |
| 0           | 1000                            | 6718        | 303         | 0.32514225  | 0.33289318               | yes |
| 1000        | 11000                           | 18641       | 1008        | 0.51599974  | 0.55542611               | yes |
| 11000       | 37000                           | 60465       | 2728        | 0.32547425  | 0.41201516               | yes |
| 37000       | 38000                           | 2416        | 80          | 0.00363501  | 0.00366132               | no  |
| 38000       | 723000                          | 248524      | 6993        | -0.16428446 | -0.52544236              | yes |
|             |                                 | 336764      | 11112       |             |                          |     |
|             |                                 |             |             |             |                          |     |
| Transition: | Temperate Forest to Agriculture |             |             | Variable:   | distance_cities          |     |
|             |                                 | Possible    | Executed    | Weight      |                          |     |
| Range       | Transitions                     | Transitions | Coefficient | Contrast    | Significant?             |     |
| 0           | 2000                            | 3386        | 406         | 1.38941889  | 1.41765915               | yes |
| 2000        | 3000                            | 6910        | 593         | 1.01693902  | 1.05250295               | yes |
| 3000        | 6000                            | 30926       | 2072        | 0.74901001  | 0.86384625               | yes |
| 6000        | 8000                            | 23075       | 1212        | 0.49022049  | 0.53686468               | yes |
| 8000        | 11000                           | 34618       | 1486        | 0.27833268  | 0.31539421               | yes |
| 11000       | 12000                           | 9557        | 332         | 0.05820681  | 0.05995715               | no  |
| 12000       | 19000                           | 68668       | 1968        | -0.14044284 | -0.17366957              | yes |
| 19000       | 24000                           | 37375       | 858         | -0.36818477 | -0.40638341              | yes |
| 24000       | 43000                           | 87843       | 1650        | -0.57306937 | -0.71906491              | yes |
| 43000       | 44000                           | 2892        | 40          | -0.88415201 | -0.88932865              | yes |
| 44000       | 45000                           | 2509        | 52          | -0.47270834 | -0.47557032              | yes |
| 45000       | 46000                           | 2295        | 100         | -0.75641426 | -0.7601173               | yes |
| 46000       | 282000                          | 26710       | 343         | -0.94656865 | -0.99841377              | yes |
|             |                                 | 336764      | 11112       |             |                          |     |
|             |                                 |             |             |             |                          |     |
| Transition: | Temperate Forest to Agriculture |             |             | Variable:   | distance_roads           |     |
|             |                                 | Possible    | Executed    | Weight      |                          |     |

| Range       |                                 | Transitions | Transitions | Coefficient | Contrast                     | Significant? |
|-------------|---------------------------------|-------------|-------------|-------------|------------------------------|--------------|
| 0           | 1000                            | 15293       | 1244        | 0.9535845   | 1.02821352                   | yes          |
| 1000        | 2000                            | 32615       | 2011        | 0.65530511  | 0.75625515                   | yes          |
| 2000        | 3000                            | 33300       | 1619        | 0.40389526  | 0.45901798                   | yes          |
| 3000        | 5000                            | 46682       | 1839        | 0.18385817  | 0.21662222                   | yes          |
| 5000        | 6000                            | 27649       | 888         | -0.02792542 | -0.03038808                  | no           |
| 6000        | 7000                            | 18318       | 476         | -0.24608893 | -0.25865442                  | yes          |
| 7000        | 14000                           | 96997       | 2096        | -0.43499976 | -0.57046505                  | yes          |
| 14000       | 16000                           | 15883       | 270         | -0.6796335  | -0.70416661                  | yes          |
| 16000       | 34000                           | 49085       | 664         | -0.91160301 | -1.01096621                  | yes          |
| 34000       | 35000                           | 313         | 3           | -1.26015629 | -1.26083866                  | yes          |
| 35000       | 36000                           | 206         | 1           | -1.94520626 | -1.94574597                  | no           |
| 36000       | 276000                          | 423         | 1           | -2.66720159 | -2.6684083                   | yes          |
|             |                                 | 336764      | 11112       |             |                              |              |
|             |                                 |             |             |             |                              |              |
| Transition: | Temperate Forest to Agriculture |             |             | Variable:   | incomes                      |              |
|             |                                 | Possible    | Executed    | Weight      |                              |              |
| Range       |                                 | Transitions | Transitions | Coefficient | Contrast                     | Significant? |
| 0           | 10000                           | 143769      | 6156        | -0.43768379 | -0.89978211                  | yes          |
| 10000       | 20000                           | 158761      | 3405        | 0.19957694  | 0.26886615                   | yes          |
| 20000       | 30000                           | 27577       | 1167        | 0.70812608  | 0.85362685                   | yes          |
| 30000       | 40000                           | 6657        | 384         | 1.03406501  | 1.08686729                   | yes          |
|             |                                 | 336764      | 11112       |             |                              |              |
|             |                                 |             |             |             |                              |              |
| Transition: | Temperate Forest to Agriculture |             |             | Variable:   | altitude                     |              |
|             |                                 | Possible    | Executed    | Weight      |                              |              |
| Range       |                                 | Transitions | Transitions | Coefficient | Contrast                     | Significant? |
| 0           | 100                             | 849         | 470         | 3.59299407  | 3.63504673                   | yes          |
| 100         | 200                             | 298         | 63          | 2.06134679  | 2.06631058                   | yes          |
| 200         | 400                             | 2144        | 143         | 0.73923988  | 0.74602878                   | yes          |
| 400         | 500                             | 2254        | 101         | 0.3183006   | 0.32079809                   | yes          |
| 500         | 600                             | 3494        | 166         | 0.37965857  | 0.38443794                   | yes          |
| 600         | 2000                            | 174130      | 5967        | 0.03910812  | 0.08262809                   | yes          |
| 2000        | 2500                            | 111005      | 3158        | -0.15297706 | -0.2208586                   | yes          |
| 2500        | 2800                            | 32617       | 796         | -0.3320731  | -0.36221537                  | yes          |
| 2800        | 4300                            | 9973        | 248         | -0.29102317 | -0.29876414                  | yes          |
|             |                                 | 336764      | 11112       |             |                              |              |
|             |                                 |             |             |             |                              |              |
| Transition: | Temperate Forest to Agriculture |             |             | Variable:   | potential_evapotranspiration |              |
|             |                                 | Possible    | Executed    | Weight      |                              |              |
| Range       |                                 | Transitions | Transitions | Coefficient | Contrast                     | Significant? |

|             |                                 |             |             |             |                    |              |
|-------------|---------------------------------|-------------|-------------|-------------|--------------------|--------------|
| 0           | 1000                            | 139         | 27          | 1.95514172  | 1.95723049         | yes          |
| 1000        | 2000                            | 30178       | 1049        | 0.05390681  | 0.05936254         | no           |
| 2000        | 3000                            | 106843      | 6305        | 0.60861093  | 1.07734096         | yes          |
| 3000        | 4000                            | 102398      | 2299        | -0.39588173 | -0.53135819        | yes          |
| 4000        | 5000                            | 74494       | 1304        | -0.64981862 | -0.77955997        | yes          |
| 5000        | 6000                            | 22200       | 119         | -1.84554558 | -1.90499248        | yes          |
| 6000        | 7000                            | 512         | 9           | -0.64556187 | -0.6462974         | no           |
|             |                                 | 336764      | 11112       |             |                    |              |
|             |                                 |             |             |             |                    |              |
| Transition: | Temperate Forest to Agriculture |             |             | Variable:   | population_density |              |
|             |                                 | Possible    | Executed    | Weight      |                    |              |
| Range       |                                 | Transitions | Transitions | Coefficient | Contrast           | Significant? |
| 0           | 100                             | 314565      | 9568        | -0.08407402 | -0.86829677        | yes          |
| 100         | 200                             | 14657       | 1001        | 0.76462424  | 0.81618694         | yes          |
| 200         | 14100                           | 7542        | 543         | 0.82139048  | 0.84976431         | yes          |
|             |                                 | 336764      | 11112       |             |                    |              |
|             |                                 |             |             |             |                    |              |
| Transition: | Temperate Forest to Agriculture |             |             | Variable:   | Soils              |              |
|             |                                 | Possible    | Executed    | Weight      |                    |              |
| Range       |                                 | Transitions | Transitions | Coefficient | Contrast           | Significant? |
|             | Solonchak                       | 14          | 11          | 4.67708671  | 4.6780679          | yes          |
|             | Vertisol                        | 3261        | 437         | 1.51182732  | 1.54323871         | yes          |
|             | Litosol                         | 92301       | 1501        | -0.72472401 | -0.90648048        | yes          |
|             | Regosol                         | 92171       | 2953        | -0.03045749 | -0.04171372        | no           |
|             | Fluvisol                        | 51          | 14          | 2.40594314  | 2.40709021         | yes          |
|             | Tfeozem                         | 50231       | 1661        | 0.0022175   | 0.00260671         | no           |
|             | Xerosol                         | 1535        | 58          | 0.14047845  | 0.14116587         | no           |
|             | Yermosol                        | 35          | 2           | 0.57444334  | 0.574522           | no           |
|             | Planosol                        | 951         | 68          | 0.81398623  | 0.81740937         | yes          |
|             | Cambisol                        | 36689       | 1319        | 0.08881359  | 0.10019489         | yes          |
|             | Rendzina                        | 7069        | 327         | 0.351652    | 0.36060093         | yes          |
|             | Castagnozem                     | 1022        | 39          | 0.15075625  | 0.15124902         | no           |
|             | Acrisol                         | 12615       | 431         | 0.03603292  | 0.03746001         | no           |
|             | Luvisol                         | 25754       | 1199        | 0.3583761   | 0.39415782         | yes          |
|             | Gleysol                         | 214         | 139         | 3.99478954  | 4.0071471          | yes          |
|             | Chernozem                       | 11          | 0           | 0           | 0                  | ~            |
|             | Andosol                         | 12307       | 814         | 0.7810466   | 0.82300196         | yes          |
|             | Nitosol                         | 171         | 36          | 2.05604788  | 2.05887824         | yes          |
|             | Solonetz                        | 339         | 31          | 1.08169114  | 1.08353858         | yes          |
|             | Ranker                          | 23          | 72          | 3           | -1.75209499        | yes          |
|             |                                 | 336764      | 11112       |             |                    |              |

|             |                                 |             |             |             |                       |              |     |
|-------------|---------------------------------|-------------|-------------|-------------|-----------------------|--------------|-----|
| Transition: | Temperate Forest to Agriculture |             |             | Variable:   | slope                 |              |     |
|             |                                 | Possible    | Executed    | Weight      |                       |              |     |
|             | Range                           | Transitions | Transitions | Coefficient | Contrast              | Significant? |     |
|             | 0                               | 2           | 3073        | 718         | 2.189965              | 2.24950388   | yes |
|             | 2                               | 4           | 7855        | 866         | 1.28958358            | 1.34902633   | yes |
|             | 4                               | 6           | 13882       | 951         | 0.76792269            | 0.81687302   | yes |
|             | 6                               | 10          | 46423       | 2299        | 0.42326183            | 0.50946019   | yes |
|             | 10                              | 12          | 30983       | 1135        | 0.10830625            | 0.11991592   | yes |
|             | 12                              | 14          | 34721       | 1047        | -0.09300566           | -0.1031964   | yes |
|             | 14                              | 18          | 71890       | 1726        | -0.32723733           | -0.4010882   | yes |
|             | 18                              | 26          | 97316       | 1911        | -0.53271288           | -0.69068122  | yes |
|             | 26                              | 30          | 18707       | 298         | -0.74571003           | -0.77671711  | yes |
|             | 30                              | 58          | 11914       | 161         | -0.91232761           | -0.93447854  | yes |
|             |                                 |             | 336764      | 11112       |                       |              |     |
| Transition: | Temperate Forest to Agriculture |             |             | Variable:   | seasonality           |              |     |
|             |                                 | Possible    | Executed    | Weight      |                       |              |     |
|             | Range                           | Transitions | Transitions | Coefficient | Contrast              | Significant? |     |
|             | 0                               | 1000        | 10412       | 517         | 0.42606174            | 0.44284876   | yes |
|             | 1000                            | 4000        | 228117      | 9069        | 0.19337484            | 0.77027284   | yes |
|             | 4000                            | 5000        | 43862       | 948         | -0.43479517           | -0.48693028  | yes |
|             | 5000                            | 6000        | 28734       | 405         | -0.86995051           | -0.92383287  | yes |
|             | 6000                            | 7000        | 25553       | 172         | -1.61645794           | -1.68200206  | yes |
|             | 7000                            | 8000        | 86          | 1           | -1.06484754           | -1.06501859  | no  |
|             |                                 |             | 336764      | 11112       |                       |              |     |
| Transition: | Scrublands to Agriculture       |             |             | Variable:   | Index_marginalization |              |     |
|             |                                 | Possible    | Executed    | Weight      |                       |              |     |
|             | Range                           | Transitions | Transitions | Coefficient | Contrast              | Significant? |     |
|             |                                 | 1           | 271816      | 3742        | -0.33660869           | -0.58581339  | yes |
|             |                                 | 2           | 160411      | 3253        | 0.05736013            | 0.08197122   | yes |
|             |                                 | 3           | 58963       | 1945        | 0.55692912            | 0.64926826   | yes |
|             |                                 | 4           | 57920       | 1590        | 0.36754091            | 0.42079257   | yes |
|             |                                 | 5           | 228         | 1           | -1.43094187           | -1.43124416  | no  |
|             |                                 |             | 549338      | 10531       |                       |              |     |
| Transition: | Scrublands to Agriculture       |             |             | Variable:   | Aridity_index         |              |     |
|             |                                 | Possible    | Executed    | Weight      |                       |              |     |
|             | Range                           | Transitions | Transitions | Coefficient | Contrast              | Significant? |     |
|             | 0                               | 5000        | 548784      | 10500       | -0.0019769            | -1.11141679  | yes |

|             |                           |             |             |             |                          |              |
|-------------|---------------------------|-------------|-------------|-------------|--------------------------|--------------|
| 5000        | 10000                     | 554         | 31          | 1.10943989  | 1.11141679               | yes          |
|             |                           | 549338      | 10531       |             |                          |              |
|             |                           |             |             |             |                          |              |
| Transition: | Scrublands to Agriculture |             |             | Variable:   | Protected_Areas_distance |              |
|             |                           | Possible    | Executed    | Weight      |                          |              |
| Range       |                           | Transitions | Transitions | Coefficient | Contrast                 | Significant? |
| 0           | 1000                      | 5334        | 58          | -0.57544636 | -0.57976384              | yes          |
| 1000        | 2000                      | 1685        | 55          | 0.54603204  | 0.54823861               | yes          |
| 2000        | 245000                    | 341758      | 9155        | 0.34238474  | 1.41703582               | yes          |
| 245000      | 246000                    | 1144        | 5           | -1.4934339  | -1.49507517              | yes          |
| 246000      | 247000                    | 1193        | 8           | -1.06302236 | -1.06446414              | yes          |
| 247000      | 249000                    | 2182        | 25          | -0.52256367 | -0.52419823              | yes          |
| 249000      | 265000                    | 16630       | 154         | -0.73767331 | -0.75399779              | yes          |
| 265000      | 266000                    | 1026        | 7           | -1.04563274 | -1.04686082              | yes          |
| 266000      | 299000                    | 34748       | 173         | -1.36256041 | -1.41231725              | yes          |
| 299000      | 300000                    | 1022        | 1           | -2.99350367 | -2.99530543              | yes          |
| 300000      | 311000                    | 11266       | 30          | -1.99064666 | -2.00886784              | yes          |
| 311000      | 312000                    | 945         | 6           | -1.11802186 | -1.11919621              | yes          |
| 312000      | 316000                    | 3811        | 17          | -1.47292866 | -1.47837946              | yes          |
| 316000      | 317000                    | 947         | 2           | -2.2230036  | -2.22456908              | yes          |
| 317000      | 358000                    | 37943       | 147         | -1.61449182 | -1.67316407              | yes          |
| 358000      | 359000                    | 922         | 11          | -0.48161348 | -0.4822606               | no           |
| 359000      | 360000                    | 922         | 4           | -1.50086888 | -1.5021942               | yes          |
| 360000      | 361000                    | 928         | 6           | -1.09975161 | -1.10089435              | yes          |
| 361000      | 363000                    | 1828        | 8           | -1.49211609 | -1.49473969              | yes          |
| 363000      | 367000                    | 3520        | 22          | -1.13387005 | -1.13829208              | yes          |
| 367000      | 372000                    | 4198        | 36          | -0.81519792 | -0.81952805              | yes          |
| 372000      | 373000                    | 809         | 11          | -0.34917918 | -0.34961624              | no           |
| 373000      | 376000                    | 2355        | 23          | -0.68395318 | -0.68610424              | yes          |
| 376000      | 391000                    | 10885       | 132         | -0.46510399 | -0.47264924              | yes          |
| 391000      | 392000                    | 660         | 11          | -0.1425033  | -0.14266345              | no           |
| 392000      | 396000                    | 2501        | 30          | -0.47614668 | -0.47789048              | yes          |
| 396000      | 397000                    | 608         | 3           | -1.37158202 | -1.37242059              | yes          |
| 397000      | 398000                    | 607         | 1           | -2.47184584 | -2.47287622              | yes          |
| 398000      | 399000                    | 652         | 4           | -1.15256219 | -1.15338566              | yes          |
| 399000      | 400000                    | 629         | 2           | -1.81276521 | -1.81373964              | yes          |
| 400000      | 404000                    | 2567        | 13          | -1.34543253 | -1.34894869              | yes          |
| 404000      | 405000                    | 658         | 2           | -1.85797946 | -1.85900777              | yes          |
| 405000      | 406000                    | 656         | 5           | -0.93403758 | -0.93477164              | yes          |
| 406000      | 411000                    | 3150        | 17          | -1.2814988  | -1.28571488              | yes          |
| 411000      | 413000                    | 1212        | 4           | -1.77539287 | -1.77725747              | yes          |



|             |                           |             |             |             |                 |              |     |
|-------------|---------------------------|-------------|-------------|-------------|-----------------|--------------|-----|
| 413000      | 415000                    | 1259        | 2           | -2.50830188 | -2.5104476      | yes          |     |
| 415000      | 558000                    | 35176       | 115         | -1.7848784  | -1.84118346     | yes          |     |
| 558000      | 723000                    | 11002       | 226         | -0.00977868 | -0.00978148     | no           |     |
|             |                           | 549338      | 10531       |             |                 |              |     |
|             |                           |             |             |             |                 |              |     |
| Transition: | Scrublands to Agriculture |             |             | Variable:   | incomes_density |              |     |
|             |                           | Possible    | Executed    | Weight      |                 |              |     |
|             | Range                     | Transitions | Transitions | Coefficient | Contrast        | Significant? |     |
|             | 0                         | 2000        | 73369       | 859         | -0.40515353     | -0.46404432  | yes |
|             | 2000                      | 3000        | 58435       | 387         | -0.98004353     | -1.06426909  | yes |
|             | 3000                      | 4000        | 51212       | 450         | -0.69509843     | -0.75389115  | yes |
|             | 4000                      | 5000        | 32464       | 1598        | 1.0696549       | 1.21391692   | yes |
|             | 5000                      | 6000        | 27906       | 670         | 0.32554011      | 0.34945468   | yes |
|             | 6000                      | 7000        | 17308       | 512         | 0.53998589      | 0.56683602   | yes |
|             | 7000                      | 8000        | 43548       | 558         | -0.31380654     | -0.34051747  | yes |
|             | 8000                      | 9000        | 52679       | 384         | -0.88345618     | -0.95421314  | yes |
|             | 9000                      | 10000       | 77860       | 304         | 0.85250348      | 0.87391455   | yes |
|             | 10000                     | 11000       | 9628        | 534         | 1.19558301      | 1.24206503   | yes |
|             | 11000                     | 12000       | 17026       | 824         | -1.09086927     | -1.11533549  | yes |
|             | 12000                     | 13000       | 13926       | 471         | 0.67830934      | 0.70728351   | yes |
|             | 13000                     | 15000       | 10693       | 195         | 0.04461682      | 0.04565816   | no  |
|             | 15000                     | 16000       | 3824        | 816         | 0.33872523      | 0.34195147   | yes |
|             | 16000                     | 19000       | 12855       | 224         | -0.00170603     | -0.00175303  | no  |
|             | 19000                     | 20000       | 4697        | 216         | 0.9982342       | 1.01483968   | yes |
|             | 20000                     | 21000       | 8589        | 764         | -1.30932324     | -1.32273453  | yes |
|             | 21000                     | 22000       | 15963       | 301         | 0.0786749       | 0.08149606   | no  |
|             | 22000                     | 23000       | 7056        | 70          | -0.57261088     | -0.57915689  | yes |
|             | 23000                     | 24000       | 1135        | 36          | 0.61192029      | 0.6138973    | yes |
|             | 24000                     | 25000       | 1406        | 69          | 1.06648023      | 1.07192169   | yes |
|             | 25000                     | 26000       | 1422        | 39          | 0.46210862      | 0.46384109   | yes |
|             | 26000                     | 30000       | 4195        | 214         | 1.107245        | 1.12467684   | yes |
|             | 30000                     | 31000       | 1897        | 33          | -0.00341513     | -0.00342868  | no  |
|             | 31000                     | 32000       | 242         | 3           | -0.34729396     | -0.34744299  | no  |
|             | 32000                     | 33000       | 3           | 0           | 0               | 0            | ~   |
|             |                           | 549338      | 10531       |             |                 |              |     |
|             |                           |             |             |             |                 |              |     |
| Transition: | Scrublands to Agriculture |             |             | Variable:   | distance_cities |              |     |
|             |                           | Possible    | Executed    | Weight      |                 |              |     |
|             | Range                     | Transitions | Transitions | Coefficient | Contrast        | Significant? |     |
|             | 0                         | 2000        | 2809        | 159         | 1.1239994       | 1.13432783   | yes |
|             | 2000                      | 8000        | 37282       | 1608        | 0.83797916      | 0.93569036   | yes |

|             |                           |             |             |             |                |              |     |
|-------------|---------------------------|-------------|-------------|-------------|----------------|--------------|-----|
| 8000        | 9000                      | 9084        | 304         | 0.57420613  | 0.58715072     | yes          |     |
| 9000        | 20000                     | 109792      | 3006        | 0.36719358  | 0.48348539     | yes          |     |
| 20000       | 21000                     | 10009       | 229         | 0.18303736  | 0.18676076     | yes          |     |
| 21000       | 45000                     | 203042      | 3905        | 0.00567487  | 0.00902145     | no           |     |
| 45000       | 46000                     | 6226        | 88          | -0.3075073  | -0.31055573    | yes          |     |
| 46000       | 52000                     | 33676       | 378         | -0.5409483  | -0.56812177    | yes          |     |
| 52000       | 53000                     | 4491        | 20          | -1.47222499 | -1.47865762    | yes          |     |
| 53000       | 71000                     | 64163       | 417         | -1.09216538 | -1.17765852    | yes          |     |
| 71000       | 72000                     | 2685        | 44          | -0.15731316 | -0.15803053    | no           |     |
| 72000       | 78000                     | 15085       | 189         | -0.42969087 | -0.43958167    | yes          |     |
| 78000       | 79000                     | 2046        | 16          | -0.90579223 | -0.90804477    | yes          |     |
| 79000       | 80000                     | 2497        | 41          | -1.71457768 | -1.71762143    | yes          |     |
| 80000       | 287000                    | 46451       | 127         | -1.96181826 | -2.039624      | yes          |     |
|             |                           | 549338      | 10531       |             |                |              |     |
|             |                           |             |             |             |                |              |     |
| Transition: | Scrublands to Agriculture |             |             | Variable:   | distance_roads |              |     |
|             |                           | Possible    | Executed    | Weight      |                |              |     |
|             | Range                     | Transitions | Transitions | Coefficient | Contrast       | Significant? |     |
|             | 0                         | 1000        | 24193       | 1006        | 0.79742444     | 0.85384043   | yes |
|             | 1000                      | 2000        | 48603       | 1573        | 0.53723308     | 0.6076773    | yes |
|             | 2000                      | 3000        | 46846       | 1246        | 0.33506485     | 0.37255947   | yes |
|             | 3000                      | 6000        | 103037      | 2250        | 0.13295499     | 0.16622167   | yes |
|             | 6000                      | 7000        | 25719       | 467         | -0.05529723    | -0.05793895  | no  |
|             | 7000                      | 16000       | 170227      | 2576        | -0.24061248    | -0.33282483  | yes |
|             | 16000                     | 17000       | 10354       | 103         | -0.6653674     | -0.67474729  | yes |
|             | 17000                     | 19000       | 19388       | 251         | -0.39889183    | -0.41093224  | yes |
|             | 19000                     | 54000       | 96879       | 1034        | -0.59426338    | -0.6867895   | yes |
|             | 54000                     | 56000       | 630         | 14          | 0.15084451     | 0.15103089   | no  |
|             | 56000                     | 57000       | 221         | 8           | 0.65318352     | 0.65354808   | no  |
|             | 57000                     | 58000       | 200         | 1           | -1.35827068    | -1.35854512  | no  |
|             | 58000                     | 62000       | 656         | 2           | -1.85492602    | -1.85595062  | yes |
|             | 62000                     | 63000       | 141         | 0           | 0              | 0            | ~   |
|             | 63000                     | 279000      | 2244        | 0           | 0              | 0            | ~   |
|             |                           | 549338      | 10531       |             |                |              |     |
|             |                           |             |             |             |                |              |     |
| Transition: | Scrublands to Agriculture |             |             | Variable:   | altitude       |              |     |
|             |                           | Possible    | Executed    | Weight      |                |              |     |
|             | Range                     | Transitions | Transitions | Coefficient | Contrast       | Significant? |     |
|             | 0                         | 100         | 40651       | 1035        | 0.2901097      | 0.31718631   | yes |
|             | 100                       | 200         | 41458       | 881         | 0.10504229     | 0.11410449   | yes |
|             | 200                       | 300         | 37302       | 582         | -0.20966505    | -0.22340462  | yes |

|             |                           |             |             |             |                              |              |     |
|-------------|---------------------------|-------------|-------------|-------------|------------------------------|--------------|-----|
| 300         | 400                       | 29999       | 355         | -0.48995589 | -0.51225924                  | yes          |     |
| 400         | 500                       | 27699       | 240         | -0.80486899 | -0.83412748                  | yes          |     |
| 500         | 700                       | 45209       | 496         | -0.56650229 | -0.60489804                  | yes          |     |
| 700         | 800                       | 17806       | 378         | 0.10400215  | 0.1076729                    | yes          |     |
| 800         | 900                       | 17170       | 441         | 0.2990872   | 0.31032225                   | yes          |     |
| 900         | 1000                      | 15720       | 218         | -0.32928792 | -0.33756558                  | yes          |     |
| 1000        | 1100                      | 20487       | 215         | -0.61141653 | -0.62914286                  | yes          |     |
| 1100        | 1200                      | 29569       | 382         | -0.40111673 | -0.41986602                  | yes          |     |
| 1200        | 1500                      | 108200      | 1674        | -0.21823177 | -0.26542105                  | yes          |     |
| 1500        | 1600                      | 22060       | 867         | 0.73855411  | 0.78433831                   | yes          |     |
| 1600        | 1700                      | 16773       | 511         | 0.47472456  | 0.49381553                   | yes          |     |
| 1700        | 1800                      | 16164       | 304         | -0.01958645 | -0.02017457                  | no           |     |
| 1800        | 1900                      | 15396       | 375         | 0.24466287  | 0.2526446                    | yes          |     |
| 1900        | 2000                      | 15105       | 518         | 0.59703059  | 0.62002105                   | yes          |     |
| 2000        | 3200                      | 32570       | 1059        | 0.54418545  | 0.59004008                   | yes          |     |
|             |                           | 549338      | 10531       |             |                              |              |     |
|             |                           |             |             |             |                              |              |     |
| Transition: | Scrublands to Agriculture |             |             | Variable:   | Potential_evapotranspiration |              |     |
|             |                           | Possible    | Executed    | Weight      |                              |              |     |
|             | Range                     | Transitions | Transitions | Coefficient | Contrast                     | Significant? |     |
|             | 0                         | 1000        | 10829       | 128         | -0.49102806                  | -0.49885942  | yes |
|             | 1000                      | 3000        | 7058        | 380         | 1.06863158                   | 1.09291115   | yes |
|             | 3000                      | 4000        | 52878       | 1885        | 0.6372736                    | 0.73507685   | yes |
|             | 4000                      | 5000        | 164299      | 2363        | -0.29223505                  | -0.39559032  | yes |
|             | 5000                      | 6000        | 265635      | 5337        | 0.04787072                   | 0.09478283   | yes |
|             | 6000                      | 7000        | 47714       | 396         | -0.84819769                  | -0.90178706  | yes |
|             | 7000                      | 8000        | 925         | 42          | 0.88937857                   | 0.89173461   | yes |
|             |                           | 549338      | 10531       |             |                              |              |     |
|             |                           |             |             |             |                              |              |     |
| Transition: | Scrublands to Agriculture |             |             | Variable:   | slope                        |              |     |
|             |                           | Possible    | Executed    | Weight      |                              |              |     |
|             | Range                     | Transitions | Transitions | Coefficient | Contrast                     | Significant? |     |
|             | 0                         | 2           | 258135      | 7970        | 0.48838662                   | 1.27817189   | yes |
|             | 2                         | 4           | 77964       | 1364        | -0.09335269                  | -0.10802071  | yes |
|             | 4                         | 6           | 43594       | 466         | -0.59291925                  | -0.63111118  | yes |
|             | 6                         | 8           | 33287       | 236         | -1.00715247                  | -1.04780846  | yes |
|             | 8                         | 14          | 71584       | 360         | -1.35265826                  | -1.45969937  | yes |
|             | 14                        | 16          | 16617       | 44          | -1.99651768                  | -2.02358178  | yes |
|             | 16                        | 48          | 48157       | 91          | -2.34225916                  | -2.42681008  | yes |
|             |                           | 549338      | 10531       |             |                              |              |     |
|             |                           |             |             |             |                              |              |     |

| Transition: | Scrublands to Agriculture                 |             |             | Variable:   | seasonality           |              |
|-------------|-------------------------------------------|-------------|-------------|-------------|-----------------------|--------------|
|             |                                           | Possible    | Executed    | Weight      |                       |              |
| Range       |                                           | Transitions | Transitions | Coefficient | Contrast              | Significant? |
| 0           | 1000                                      | 10829       | 128         | -0.49102806 | -0.49885942           | yes          |
| 1000        | 2000                                      | 3425        | 181         | 1.04896876  | 1.06026663            | yes          |
| 2000        | 4000                                      | 108229      | 2849        | 0.32442934  | 0.42223865            | yes          |
| 4000        | 5000                                      | 110252      | 1264        | -0.52192234 | -0.620052             | yes          |
| 5000        | 6000                                      | 139446      | 4053        | 0.42630984  | 0.6228272             | yes          |
| 6000        | 7000                                      | 123307      | 1660        | -0.35927166 | -0.44362349           | yes          |
| 7000        | 8000                                      | 49362       | 383         | -0.91607778 | -0.97433426           | yes          |
| 8000        | 9000                                      | 4488        | 13          | -1.90627813 | -1.91338298           | yes          |
|             |                                           | 549338      | 10531       |             |                       |              |
|             |                                           |             |             |             |                       |              |
| Transition: | Scrublands to Agriculture                 |             |             | Variable:   | Soils                 |              |
|             |                                           | Possible    | Executed    | Weight      |                       |              |
| Range       |                                           | Transitions | Transitions | Coefficient | Contrast              | Significant? |
|             | Solonchak                                 | 7655        | 287         | 0.68961479  | 0.70347689            | yes          |
|             | Vertisol                                  | 17590       | 727         | 0.79108347  | 0.83081916            | yes          |
|             | Litosol                                   | 126485      | 665         | -1.3077864  | -1.50849894           | yes          |
|             | Regosol                                   | 149777      | 1600        | -0.59336973 | -0.75017143           | yes          |
|             | Fluvisol                                  | 5110        | 42          | -0.85799778 | -0.86345206           | yes          |
|             | Tfeozem                                   | 12181       | 517         | 0.81881457  | 0.84726817            | yes          |
|             | Xerosol                                   | 135259      | 4566        | 0.58082063  | 0.87142398            | yes          |
|             | Yermosol                                  | 57416       | 1060        | -0.03838566 | -0.04277494           | no           |
|             | Planosol                                  | 925         | 49          | 1.05148836  | 1.05452501            | yes          |
|             | Cambisol                                  | 2324        | 83          | 0.63919728  | 0.64294214            | yes          |
|             | Rendzina                                  | 27500       | 515         | -0.02383539 | -0.02507644           | no           |
|             | Castagnozem                               | 5356        | 309         | 1.14182614  | 1.16219603            | yes          |
|             | Acrisol                                   | 9           | 0           | 0           | 0                     | ~            |
|             | Luvisol                                   | 552         | 18          | 0.54501007  | 0.5457292             | yes          |
|             | Gleysol                                   | 268         | 35          | 2.03934376  | 2.04224028            | yes          |
|             | Chernozem                                 | 72          | 0           | 0           | 0                     | ~            |
|             | Andosol                                   | 83          | 8           | 1.69698758  | 1.69760832            | yes          |
|             | Nitosol                                   | 0           | 0           | 0           | 0                     | ~            |
|             | Solonetz                                  | 0           | 0           | 0           | 0                     | ~            |
|             | Ranker                                    | 776         | 50          | 1.33007946  | 1.33351199            | yes          |
|             |                                           | 549338      | 10531       |             |                       |              |
|             |                                           |             |             |             |                       |              |
| Transition: | Tropical Evergreen Forests to Agriculture |             |             | Variable:   | Index_marginalization |              |
|             |                                           | Possible    | Executed    | Weight      |                       |              |
| Range       |                                           | Transitions | Transitions | Coefficient | Contrast              | Significant? |

|             |                                           |             |             |             |                          |              |     |
|-------------|-------------------------------------------|-------------|-------------|-------------|--------------------------|--------------|-----|
|             | 1                                         | 4355        | 74          | -1.44152891 | -1.47790022              | yes          |     |
|             | 2                                         | 14956       | 902         | -0.12969991 | -0.15125437              | yes          |     |
|             | 3                                         | 10949       | 947         | 0.25910664  | 0.29561781               | yes          |     |
|             | 4                                         | 49868       | 3053        | -0.11373105 | -0.21820358              | yes          |     |
|             | 5                                         | 19147       | 1784        | 0.34121005  | 0.43982836               | yes          |     |
|             |                                           | 99275       | 6760        |             |                          |              |     |
|             |                                           |             |             |             |                          |              |     |
| Transition: | Tropical Evergreen Forests to Agriculture |             |             | Variable:   | Aridity_index            |              |     |
|             |                                           | Possible    | Executed    | Weight      |                          |              |     |
|             | Range                                     | Transitions | Transitions | Coefficient | Contrast                 | Significant? |     |
|             | 0                                         | 5000        | 1962        | 90          | -0.41860508              | -0.42564413  | yes |
|             | 5000                                      | 15000       | 82500       | 5278        | -0.06678925              | -0.34913447  | yes |
|             | 15000                                     | 20000       | 10223       | 1099        | 0.49984027               | 0.57343221   | yes |
|             | 20000                                     | 25000       | 4262        | 255         | -0.13818666              | -0.14401273  | yes |
|             | 25000                                     | 30000       | 308         | 38          | 0.6555121                | 0.65822655   | yes |
|             | 30000                                     | 35000       | 20          | 0           | ~                        | 0            | ~   |
|             |                                           | 99275       | 6760        |             |                          |              |     |
|             |                                           |             |             |             |                          |              |     |
| Transition: | Tropical Evergreen Forests to Agriculture |             |             | Variable:   | Protected_Areas_distance |              |     |
|             |                                           | Possible    | Executed    | Weight      |                          |              |     |
|             | Range                                     | Transitions | Transitions | Coefficient | Contrast                 | Significant? |     |
|             | 0                                         | 1000        | 4805        | 55          | -1.84221881              | -1.88675744  | yes |
|             | 1000                                      | 2000        | 741         | 57          | 0.13144125               | 0.13248809   | no  |
|             | 2000                                      | 5000        | 2143        | 132         | -0.10723756              | -0.10949452  | no  |
|             | 5000                                      | 7000        | 1650        | 125         | 0.11491195               | 0.11695499   | no  |
|             | 7000                                      | 40000       | 32498       | 2858        | 0.27734518               | 0.44065667   | yes |
|             | 40000                                     | 41000       | 994         | 114         | 0.57262444               | 0.58007467   | yes |
|             | 41000                                     | 47000       | 6685        | 635         | 0.36215935               | 0.3931724    | yes |
|             | 47000                                     | 48000       | 1130        | 87          | 0.13239957               | 0.13401504   | no  |
|             | 48000                                     | 79000       | 30246       | 1978        | -0.04329629              | -0.06176803  | yes |
|             | 79000                                     | 80000       | 655         | 21          | -0.79117861              | -0.7949438   | yes |
|             | 80000                                     | 81000       | 697         | 35          | -0.32356959              | -0.32555995  | no  |
|             | 81000                                     | 82000       | 648         | 23          | -0.68590953              | -0.68927995  | yes |
|             | 82000                                     | 178000      | 16383       | 640         | -0.58633502              | -0.67340503  | yes |
|             |                                           | 99275       | 6760        |             |                          |              |     |
|             |                                           |             |             |             |                          |              |     |
| Transition: | Tropical Evergreen Forests to Agriculture |             |             | Variable:   | distance_cities          |              |     |
|             |                                           | Possible    | Executed    | Weight      |                          |              |     |
|             | Range                                     | Transitions | Transitions | Coefficient | Contrast                 | Significant? |     |
|             | 0                                         | 2000        | 636         | 92          | 0.84065617               | 0.84849018   | yes |
|             | 2000                                      | 7000        | 8582        | 1022        | 0.61670714               | 0.69572596   | yes |

|             |                                           |             |             |             |                 |              |     |
|-------------|-------------------------------------------|-------------|-------------|-------------|-----------------|--------------|-----|
| 7000        | 8000                                      | 2796        | 266         | 0.36533856  | 0.37782874      | yes          |     |
| 8000        | 26000                                     | 45828       | 3674        | 0.17776824  | 0.35588875      | yes          |     |
| 26000       | 27000                                     | 1948        | 99          | -0.30946355 | -0.31488258     | yes          |     |
| 27000       | 77000                                     | 37577       | 1588        | -0.50292114 | -0.72772188     | yes          |     |
| 77000       | 78000                                     | 142         | 0           | 0           | 0               | ~            |     |
| 78000       | 79000                                     | 121         | 1           | -2.16967491 | -2.17082589     | yes          |     |
| 79000       | 80000                                     | 118         | 0           | 0           | 0               | ~            |     |
| 80000       | 81000                                     | 116         | 18          | -2.12711529 | -2.1282121      | yes          |     |
| 81000       | 82000                                     | 220         | 0           | 0           | 0               | ~            |     |
| 82000       | 106000                                    | 1191        | 0           | 0           | 0               | ~            |     |
|             |                                           | 99275       | 6760        |             |                 |              |     |
|             |                                           |             |             |             |                 |              |     |
| Transition: | Tropical Evergreen Forests to Agriculture |             |             | Variable:   | distance_rivers |              |     |
|             |                                           | Possible    | Executed    | Weight      |                 |              |     |
|             | Range                                     | Transitions | Transitions | Coefficient | Contrast        | Significant? |     |
|             | 0                                         | 1000        | 3350        | 333         | 0.41247215      | 0.42983266   | yes |
|             | 1000                                      | 56000       | 72716       | 6111        | 0.22765868      | 1.29826233   | yes |
|             | 56000                                     | 57000       | 220         | 2           | -2.07499998     | -2.07706323  | yes |
|             | 57000                                     | 58000       | 228         | 5           | -1.18138596     | -1.18305937  | yes |
|             | 58000                                     | 59000       | 212         | 2           | -2.03761245     | -2.03958903  | yes |
|             | 59000                                     | 60000       | 214         | 4           | -1.34446527     | -1.34614586  | yes |
|             | 60000                                     | 61000       | 230         | 2           | -2.11985054     | -2.12202215  | yes |
|             | 61000                                     | 62000       | 233         | 4           | -1.43107974     | -1.43296619  | yes |
|             | 62000                                     | 64000       | 447         | 4           | -2.09092751     | -2.09513553  | yes |
|             | 64000                                     | 67000       | 627         | 9           | -1.61291598     | -1.61828614  | yes |
|             | 67000                                     | 88000       | 3281        | 28          | -2.13878051     | -2.17042483  | yes |
|             | 88000                                     | 89000       | 135         | 2           | -1.58085404     | -1.58199678  | yes |
|             | 89000                                     | 90000       | 141         | 0           | 0               | 0            | ~   |
|             | 90000                                     | 91000       | 131         | 1           | -2.25118655     | -2.25244477  | yes |
|             | 91000                                     | 92000       | 133         | 0           | 0               | 0            | ~   |
|             | 92000                                     | 93000       | 129         | 3           | -1.12132171     | -1.1222407   | no  |
|             | 93000                                     | 94000       | 122         | 2           | -1.47799666     | -1.47899869  | yes |
|             | 94000                                     | 95000       | 123         | 1           | -2.18767314     | -2.18884478  | yes |
|             | 95000                                     | 96000       | 118         | 2           | -1.44409511     | -1.44505384  | yes |
|             | 96000                                     | 99000       | 370         | 3           | -2.19040166     | -2.19393258  | yes |
|             | 99000                                     | 100000      | 114         | 0           | 0               | 0            | ~   |
|             | 100000                                    | 116000      | 1547        | 13          | -2.15433672     | -2.16913189  | yes |
|             | 116000                                    | 117000      | 98          | 2           | -1.25485311     | -1.25559541  | no  |
|             | 117000                                    | 118000      | 96          | 0           | 0               | 0            | ~   |
|             | 118000                                    | 146000      | 2723        | 16          | -2.51465966     | -2.54198673  | yes |
|             | 146000                                    | 147000      | 101         | 4           | -0.57206871     | -0.57252585  | no  |

|        |        |     |    |             |             |     |
|--------|--------|-----|----|-------------|-------------|-----|
| 147000 | 148000 | 96  | 3  | -0.8176393  | -0.81820116 | no  |
| 148000 | 150000 | 210 | 5  | -1.09722416 | -1.09870256 | yes |
| 150000 | 151000 | 101 | 0  | 0           | 0           | ~   |
| 151000 | 154000 | 304 | 4  | -1.70114021 | -1.70379631 | yes |
| 154000 | 155000 | 94  | 5  | -0.26285055 | -0.2630731  | no  |
| 155000 | 158000 | 276 | 10 | -0.66456331 | -0.66596228 | yes |
| 158000 | 159000 | 86  | 1  | -1.82630335 | -1.82707461 | no  |
| 159000 | 160000 | 89  | 2  | -1.15641303 | -1.15705796 | no  |
| 160000 | 161000 | 85  | 1  | -1.8144689  | -1.81522933 | no  |
| 161000 | 162000 | 90  | 2  | -1.16784173 | -1.16849748 | no  |
| 162000 | 163000 | 82  | 4  | -0.35406656 | -0.35431813 | no  |
| 163000 | 164000 | 79  | 1  | -1.74036092 | -1.74105645 | no  |
| 164000 | 165000 | 76  | 2  | -0.99457001 | -0.9950743  | no  |
| 165000 | 166000 | 79  | 4  | -0.31484585 | -0.31506497 | no  |
| 166000 | 167000 | 75  | 3  | -0.56170593 | -0.5620406  | no  |
| 167000 | 168000 | 69  | 2  | -0.89519754 | -0.8956261  | no  |
| 168000 | 184000 | 978 | 22 | -1.15536756 | -1.16249503 | yes |
| 184000 | 187000 | 142 | 2  | -1.63214734 | -1.63336585 | yes |
| 187000 | 190000 | 153 | 1  | -2.40753262 | -2.40902901 | yes |
| 190000 | 191000 | 55  | 0  | 0           | 0           | ~   |
| 191000 | 198000 | 394 | 3  | -2.25374737 | -2.25753878 | yes |
| 198000 | 199000 | 53  | 0  | 0           | 0           | ~   |
| 199000 | 200000 | 63  | 1  | -1.51078648 | -1.51130893 | no  |
| 200000 | 201000 | 62  | 0  | 0           | 0           | ~   |
| 201000 | 202000 | 57  | 8  | 0.80396915  | 0.8046235   | yes |
| 202000 | 203000 | 56  | 10 | 1.0902916   | 1.09127464  | yes |
| 203000 | 204000 | 64  | 5  | 0.14824837  | 0.14835035  | no  |
| 204000 | 205000 | 59  | 3  | -0.3103915  | -0.3105531  | no  |
| 205000 | 206000 | 58  | 4  | 0.01365822  | 0.01366625  | no  |
| 206000 | 207000 | 58  | 5  | 0.2554939   | 0.25566078  | no  |
| 207000 | 208000 | 61  | 3  | -0.34548282 | -0.34566605 | no  |
| 208000 | 209000 | 62  | 1  | -1.49452596 | -1.49503759 | no  |
| 209000 | 210000 | 64  | 2  | -0.8176393  | -0.81801379 | no  |
| 210000 | 211000 | 62  | 1  | -1.49452596 | -1.49503759 | no  |
| 211000 | 212000 | 65  | 4  | -0.1082316  | -0.10829928 | no  |
| 212000 | 213000 | 64  | 3  | -0.39591367 | -0.39612936 | no  |
| 213000 | 214000 | 63  | 0  | 0           | 0           | ~   |
| 214000 | 216000 | 120 | 1  | -2.16277559 | -2.16391476 | yes |
| 216000 | 217000 | 66  | 0  | 0           | 0           | ~   |
| 217000 | 219000 | 122 | 1  | -2.17944264 | -2.18060345 | yes |
| 219000 | 220000 | 60  | 2  | -0.75094793 | -0.75127915 | no  |

|             |                                           |             |             |                              |             |              |     |
|-------------|-------------------------------------------|-------------|-------------|------------------------------|-------------|--------------|-----|
| 220000      | 221000                                    | 62          | 0           | 0                            | 0           | ~            |     |
| 221000      | 247000                                    | 1562        | 10          | -2.4283667                   | -2.44380428 | yes          |     |
| 247000      | 248000                                    | 69          | 7           | 0.43512367                   | 0.43548932  | no           |     |
| 248000      | 249000                                    | 66          | 9           | 0.77052121                   | 0.77123715  | yes          |     |
| 249000      | 250000                                    | 65          | 6           | 0.33056993                   | 0.33081996  | no           |     |
| 250000      | 256000                                    | 406         | 28          | 0.01365822                   | 0.01371464  | no           |     |
| 256000      | 257000                                    | 64          | 0           | 0                            | 0           | ~            |     |
| 257000      | 346000                                    | 4190        | 16          | -2.94769346                  | -2.99149026 | yes          |     |
|             |                                           | 99275       | 6760        |                              |             |              |     |
|             |                                           |             |             |                              |             |              |     |
| Transition: | Tropical Evergreen Forests to Agriculture |             | Variable:   | distance_roads               |             |              |     |
|             |                                           | Possible    | Executed    | Weight                       |             |              |     |
|             | Range                                     | Transitions | Transitions | Coefficient                  | Contrast    | Significant? |     |
|             | 0                                         | 1000        | 4290        | 661                          | 0.91338934  | 0.97627126   | yes |
|             | 1000                                      | 2000        | 10046       | 1110                         | 0.53061986  | 0.6084087    | yes |
|             | 2000                                      | 6000        | 31573       | 2848                         | 0.30519707  | 0.48039686   | yes |
|             | 6000                                      | 7000        | 5243        | 390                          | 0.09514229  | 0.10068343   | no  |
|             | 7000                                      | 8000        | 5569        | 342                          | -0.11043414 | -0.11667559  | yes |
|             | 8000                                      | 10000       | 9221        | 481                          | -0.2834503  | -0.3088743   | yes |
|             | 10000                                     | 13000       | 9370        | 377                          | -0.55560868 | -0.60048472  | yes |
|             | 13000                                     | 14000       | 2693        | 81                           | -0.85707443 | -0.8736593   | yes |
|             | 14000                                     | 35000       | 20315       | 466                          | -1.13537537 | -1.30544647  | yes |
|             | 35000                                     | 36000       | 235         | 1                            | -2.83897321 | -2.8413578   | yes |
|             | 36000                                     | 37000       | 194         | 2                            | -1.94800029 | -1.94978188  | yes |
|             | 37000                                     | 38000       | 144         | 0                            | 0           | 0            | ~   |
|             | 38000                                     | 39000       | 128         | 1                            | -2.22783918 | -2.22906494  | yes |
|             | 39000                                     | 40000       | 100         | 0                            | 0           | 0            | ~   |
|             | 40000                                     | 47000       | 154         | 0                            | 0           | 0            | ~   |
|             |                                           | 99275       | 6760        |                              |             |              |     |
|             |                                           |             |             |                              |             |              |     |
| Transition: | Tropical Evergreen Forests to Agriculture |             | Variable:   | Potential_evapotranspiration |             |              |     |
|             |                                           | Possible    | Executed    | Weight                       |             |              |     |
|             | Range                                     | Transitions | Transitions | Coefficient                  | Contrast    | Significant? |     |
|             | 0                                         | 1000        | 1472        | 70                           | -0.38081192 | -0.38567321  | yes |
|             | 1000                                      | 2000        | 2461        | 91                           | -0.64343782 | -0.65583617  | yes |
|             | 2000                                      | 3000        | 80516       | 5098                         | -0.07784976 | -0.36331635  | yes |
|             | 3000                                      | 4000        | 14815       | 1501                         | 0.43366334  | 0.52936347   | yes |
|             | 4000                                      | 5000        | 11          | 0                            | 0           | 0            | ~   |
|             |                                           | 99275       | 6760        |                              |             |              |     |
|             |                                           |             |             |                              |             |              |     |
| Transition: | Tropical Evergreen Forests to Agriculture |             | Variable:   | GDP                          |             |              |     |



|       |      | Possible    | Executed    | Weight      |             |              |
|-------|------|-------------|-------------|-------------|-------------|--------------|
| Range |      | Transitions | Transitions | Coefficient | Contrast    | Significant? |
| 0     | 100  | 1285        | 61          | -0.37184564 | -0.37617565 | yes          |
| 100   | 300  | 9745        | 624         | -0.0550244  | -0.06113299 | no           |
| 300   | 400  | 1449        | 153         | 0.49056     | 0.49998104  | yes          |
| 400   | 500  | 2065        | 181         | 0.28450453  | 0.29166237  | yes          |
| 500   | 600  | 3099        | 509         | 1.00019482  | 1.05320319  | yes          |
| 600   | 700  | 3444        | 211         | -0.10214769 | -0.10580915 | no           |
| 700   | 900  | 3877        | 289         | 0.10823642  | 0.11306035  | no           |
| 900   | 1000 | 1392        | 255         | 1.13227501  | 1.15992074  | yes          |
| 1000  | 1400 | 2648        | 327         | 0.66736672  | 0.69316436  | yes          |
| 1400  | 1500 | 1464        | 109         | 0.1069511   | 0.10870142  | no           |
| 1500  | 1600 | 1084        | 49          | -0.42317645 | -0.42723638 | yes          |
| 1600  | 1700 | 10228       | 127         | -1.74904267 | -1.84979409 | yes          |
| 1700  | 1800 | 816         | 56          | 0.01919321  | 0.01936048  | no           |
| 1800  | 1900 | 1380        | 169         | 0.65785693  | 0.67080501  | yes          |
| 1900  | 2300 | 1833        | 522         | 1.70628206  | 1.77621616  | yes          |
| 2300  | 2400 | 172         | 3           | -1.40412647 | -1.40556367 | yes          |
| 2400  | 2500 | 243         | 26          | 0.50535914  | 0.50697099  | yes          |
| 2500  | 2600 | 5734        | 321         | -0.19795767 | -0.20954618 | yes          |
| 2600  | 2700 | 251         | 18          | 0.06649326  | 0.06667412  | no           |
| 2700  | 2800 | 1452        | 256         | 1.08559947  | 1.11273429  | yes          |
| 2800  | 2900 | 55          | 4           | 0.08162868  | 0.08167755  | no           |
| 2900  | 3000 | 11931       | 93          | -2.21931053 | -2.34776401 | yes          |
| 3000  | 3100 | 154         | 30          | 1.20807577  | 1.21136252  | yes          |
| 3100  | 3200 | 25          | 7           | 1.68269835  | 1.6835866   | yes          |
| 3200  | 3400 | 8           | 0           | 0           | 0           | ~            |
| 3400  | 3500 | 271         | 117         | 2.35238129  | 2.36903829  | yes          |
| 3500  | 3600 | 492         | 51          | 0.46994071  | 0.47293873  | yes          |
| 3600  | 4000 | 105         | 36          | 1.97657239  | 1.98141847  | yes          |
| 4000  | 4300 | 1           | 0           | 0           | 0           | ~            |
| 4300  | 4600 | 121         | 12          | 0.42071872  | 0.42136163  | no           |
| 4600  | 4700 | 128         | 7           | -0.22272044 | -0.22299278 | no           |
| 4700  | 4900 | 449         | 84          | 1.1580794   | 1.16713182  | yes          |
| 4900  | 5200 | 1           | 0           | 0           | 0           | ~            |
| 5200  | 5400 | 1667        | 50          | -0.8491449  | -0.85969999 | yes          |
| 5400  | 5800 | 6           | 2           | 1.93401277  | 1.93427931  | yes          |
| 5800  | 5900 | 72          | 5           | 0.03190525  | 0.03192972  | no           |
| 5900  | 6500 | 3616        | 549         | 0.90680323  | 0.96105439  | yes          |
| 6500  | 6700 | 28          | 0           | 0           | 0           | ~            |
| 6700  | 7100 | 2024        | 17          | -2.14402305 | -2.16422781 | yes          |

|             |                                           |             |             |             |             |              |     |
|-------------|-------------------------------------------|-------------|-------------|-------------|-------------|--------------|-----|
| 7100        | 8300                                      | 158         | 19          | 0.637125    | 0.63852265  | yes          |     |
| 8300        | 8600                                      | 122         | 12          | 0.41158624  | 0.41221788  | no           |     |
| 8600        | 9100                                      | 3727        | 0           | 0           | 0           | ~            |     |
| 9100        | 9600                                      | 324         | 124         | 2.14912415  | 2.1663734   | yes          |     |
| 9600        | 9700                                      | 3862        | 225         | -0.15565409 | -0.16178989 | yes          |     |
| 9700        | 10600                                     | 385         | 43          | 0.55354933  | 0.55641164  | yes          |     |
| 10600       | 12400                                     | 339         | 0           | 0           | 0           | ~            |     |
| 12400       | 14700                                     | 9782        | 425         | -0.46463088 | -0.50746287 | yes          |     |
| 14700       | 15100                                     | 1680        | 9           | -2.596793   | -2.61438334 | yes          |     |
| 15100       | 20800                                     | 4032        | 226         | -0.19663909 | -0.20459947 | yes          |     |
| 20800       | 23100                                     | 47          | 346         | 0.70534736  | 0.70582064  | no           |     |
| 23100       | 30100                                     | 2           | 1           | 2.62715996  | 2.62730447  | no           |     |
|             |                                           | 99275       | 6760        |             |             |              |     |
|             |                                           |             |             |             |             |              |     |
| Transition: | Tropical Evergreen Forests to Agriculture |             |             | Variable:   | Slope       |              |     |
|             |                                           | Possible    | Executed    | Weight      |             |              |     |
|             | Range                                     | Transitions | Transitions | Coefficient | Contrast    | Significant? |     |
|             | 0                                         | 2           | 52332       | 2893        | -0.22258378 | -0.42918095  | yes |
|             | 2                                         | 4           | 11788       | 1052        | 0.29295231  | 0.33871587   | yes |
|             | 4                                         | 6           | 4578        | 569         | 0.6634451   | 0.70706958   | yes |
|             | 6                                         | 14          | 15505       | 1520        | 0.39658679  | 0.48736119   | yes |
|             | 14                                        | 16          | 3487        | 226         | -0.0533924  | -0.05529202  | no  |
|             | 16                                        | 20          | 5466        | 279         | -0.30683721 | -0.32242495  | yes |
|             | 20                                        | 24          | 3256        | 139         | -0.49429057 | -0.5078097   | yes |
|             | 24                                        | 26          | 981         | 34          | -0.71107679 | -0.71633082  | yes |
|             | 26                                        | 28          | 808         | 23          | -0.93805669 | -0.94268371  | yes |
|             | 28                                        | 48          | 1074        | 25          | -1.12085501 | -1.12856242  | yes |
|             |                                           | 99275       | 6760        |             |             |              |     |
|             |                                           |             |             |             |             |              |     |
| Transition: | Tropical Evergreen Forests to Agriculture |             |             | Variable:   | Soils       |              |     |
|             |                                           | Possible    | Executed    | Weight      |             |              |     |
|             | Range                                     | Transitions | Transitions | Coefficient | Contrast    | Significant? |     |
|             | Solonchak                                 | 1279        | 120         | 0.3485268   | 0.3538309   | yes          |     |
|             | Vertisol                                  | 9521        | 1333        | 0.80111028  | 0.92807798  | yes          |     |
|             | Litosol                                   | 15679       | 538         | -0.72095511 | -0.81674361 | yes          |     |
|             | Regosol                                   | 13333       | 718         | -0.24982439 | -0.28413152 | yes          |     |
|             | Fluvisol                                  | 10          | 0           | 0           | 0           | ~            |     |
|             | Tfeozem                                   | 2041        | 124         | -0.12188727 | -0.12431241 | no           |     |
|             | Xerosol                                   | 0           | 0           | 0           | 0           | ~            |     |
|             | Yermosol                                  | 0           | 0           | 0           | 0           | ~            |     |
|             | Planosol                                  | 0           | 0           | 0           | 0           | ~            |     |

|             |                                     |             |             |             |                 |              |     |
|-------------|-------------------------------------|-------------|-------------|-------------|-----------------|--------------|-----|
|             | Cambisol                            | 4122        | 671         | 0.97869772  | 1.04522116      | yes          |     |
|             | Rendzina                            | 36000       | 1247        | -0.71117733 | -0.97830305     | yes          |     |
|             | Castagnozem                         | 0           | 0           | 0           | 0               | ~            |     |
|             | Acrisol                             | 6211        | 752         | 0.63406333  | 0.6911751       | yes          |     |
|             | Luvisol                             | 5507        | 494         | 0.2990936   | 0.31926916      | yes          |     |
|             | Gleysol                             | 3181        | 414         | 0.7166949   | 0.74952804      | yes          |     |
|             | Chernozem                           | 0           | 0           | 0           | 0               | ~            |     |
|             | Andosol                             | 24          | 0           | 0           | 0               | ~            |     |
|             | Nitosol                             | 6           | 2           | 1.92320072  | 1.92345339      | yes          |     |
|             | Solonetz                            | 2361        | 347         | 0.87715383  | 0.90808016      | yes          |     |
|             | Ranker                              | 0           | 0           | 0           | 0               | ~            |     |
|             |                                     | 99275       | 6760        |             |                 |              |     |
|             |                                     |             |             |             |                 |              |     |
| Transition: | Tropical Dry Forests to Agriculture |             |             | Variable:   | Aridity_index   |              |     |
|             |                                     | Possible    | Executed    | Weight      |                 |              |     |
|             | Range                               | Transitions | Transitions | Coefficient | Contrast        | Significant? |     |
|             | 0                                   | 5000        | 130972      | 8426        | -0.13477057     | -0.31264966  | yes |
|             | 5000                                | 10000       | 86441       | 7421        | 0.17700657      | 0.30997874   | yes |
|             | 10000                               | 20000       | 385         | 39          | 0.35951661      | 0.36025953   | yes |
|             |                                     |             | 217798      | 15886       |                 |              |     |
|             |                                     |             |             |             |                 |              |     |
| Transition: | Tropical Dry Forests to Agriculture |             |             | Variable:   | distance_cities |              |     |
|             |                                     | Possible    | Executed    | Weight      |                 |              |     |
|             | Range                               | Transitions | Transitions | Coefficient | Contrast        | Significant? |     |
|             | 0                                   | 2000        | 3333        | 594         | 1.0174121       | 1.04203108   | yes |
|             | 2000                                | 4000        | 14404       | 1990        | 0.71519072      | 0.7861773    | yes |
|             | 4000                                | 6000        | 20437       | 2296        | 0.47887486      | 0.54152054   | yes |
|             | 6000                                | 9000        | 30098       | 2857        | 0.29092988      | 0.34511316   | yes |
|             | 9000                                | 17000       | 59870       | 4762        | 0.0972538       | 0.13642186   | yes |
|             | 17000                               | 18000       | 6476        | 410         | -0.14841658     | -0.15268531  | yes |
|             | 18000                               | 19000       | 5987        | 287         | -0.44285829     | -0.45321272  | yes |
|             | 19000                               | 38000       | 61182       | 2405        | -0.65031977     | -0.82988636  | yes |
|             | 38000                               | 39000       | 1518        | 18          | -1.87696768     | -1.88329502  | yes |
|             | 39000                               | 40000       | 1313        | 24          | -1.43768722     | -1.44258089  | yes |
|             | 40000                               | 133000      | 13180       | 243         | -1.78335426     | -1.83764401  | yes |
|             |                                     |             | 217798      | 15886       |                 |              |     |
|             |                                     |             |             |             |                 |              |     |
| Transition: | Tropical Dry Forests to Agriculture |             |             | Variable:   | distance_roads  |              |     |
|             |                                     | Possible    | Executed    | Weight      |                 |              |     |
|             | Range                               | Transitions | Transitions | Coefficient | Contrast        | Significant? |     |
|             | 0                                   | 1000        | 14315       | 2281        | 0.87927171      | 0.97282235   | yes |

|             |                                     |             |             |             |                              |     |
|-------------|-------------------------------------|-------------|-------------|-------------|------------------------------|-----|
| 1000        | 2000                                | 31705       | 3423        | 0.43068554  | 0.52245414                   | yes |
| 2000        | 3000                                | 29701       | 2638        | 0.21424731  | 0.25192972                   | yes |
| 3000        | 6000                                | 55198       | 4004        | -0.00593474 | -0.00794259                  | no  |
| 6000        | 7000                                | 11652       | 620         | -0.3364422  | -0.35281912                  | yes |
| 7000        | 18000                               | 61674       | 2713        | -0.53642743 | -0.69448854                  | yes |
| 18000       | 19000                               | 2055        | 48          | -1.1908016  | -1.1977652                   | yes |
| 19000       | 27000                               | 8527        | 139         | -1.55768972 | -1.59133179                  | yes |
| 27000       | 28000                               | 458         | 2           | -2.88695189 | -2.88908695                  | yes |
| 28000       | 30000                               | 792         | 9           | -1.92351438 | -1.92683315                  | yes |
| 30000       | 43000                               | 1675        | 9           | -2.6785625  | -2.68628116                  | yes |
| 43000       | 47000                               | 46          | 0           | 0           | 0                            | ~   |
|             |                                     | 217798      | 15886       |             |                              |     |
|             |                                     |             |             |             |                              |     |
| Transition: | Tropical Dry Forests to Agriculture |             |             | Variable:   | altitude                     |     |
|             |                                     | Possible    | Executed    | Weight      |                              |     |
| Range       | Transitions                         | Transitions | Coefficient | Contrast    | Significant?                 |     |
| 0           | 100                                 | 41584       | 4021        | 0.30790836  | 0.3939217                    | yes |
| 100         | 200                                 | 22843       | 1676        | 0.00636389  | 0.00711187                   | no  |
| 200         | 600                                 | 63734       | 3923        | -0.18193567 | -0.24961426                  | yes |
| 600         | 2700                                | 89637       | 6266        | -0.0474015  | -0.07936229                  | yes |
|             |                                     | 217798      | 15886       |             |                              |     |
|             |                                     |             |             |             |                              |     |
| Transition: | Tropical Dry Forests to Agriculture |             |             | Variable:   | Potential_evapotranspiration |     |
|             |                                     | Possible    | Executed    | Weight      |                              |     |
| Range       | Transitions                         | Transitions | Coefficient | Contrast    | Significant?                 |     |
| 0           | 1000                                | 3760        | 459         | 0.56946322  | 0.58229839                   | yes |
| 1000        | 2000                                | 4391        | 220         | -0.39988981 | -0.40681821                  | yes |
| 2000        | 3000                                | 75527       | 8038        | 0.41460942  | 0.7129485                    | yes |
| 3000        | 4000                                | 84378       | 5990        | -0.0291857  | -0.04727461                  | yes |
| 4000        | 5000                                | 29725       | 1006        | -0.80918311 | -0.8971883                   | yes |
| 5000        | 6000                                | 19947       | 173         | -2.19643789 | -2.28855538                  | yes |
| 6000        | 7000                                | 70          | 0           | 0           | 0                            | ~   |
|             |                                     | 217798      | 15886       |             |                              |     |
|             |                                     |             |             |             |                              |     |
| Transition: | Tropical Dry Forests to Agriculture |             |             | Variable:   | GDP                          |     |
|             |                                     | Possible    | Executed    | Weight      |                              |     |
| Range       | Transitions                         | Transitions | Coefficient | Contrast    | Significant?                 |     |
| 0           | 100                                 | 26589       | 977         | -0.71179779 | -0.78529831                  | yes |
| 100         | 200                                 | 24787       | 1290        | -0.3476987  | -0.38678542                  | yes |
| 200         | 300                                 | 19340       | 1392        | -0.00220529 | -0.00242655                  | no  |
| 300         | 2500                                | 106962      | 9216        | 0.19310066  | 0.42955089                   | yes |

|       |       |      |     |             |             |     |
|-------|-------|------|-----|-------------|-------------|-----|
| 2500  | 2600  | 1160 | 212 | 1.0567636   | 1.06589919  | yes |
| 2600  | 2700  | 662  | 54  | 0.133341    | 0.13378354  | no  |
| 2700  | 2800  | 497  | 58  | 0.53047543  | 0.53204249  | yes |
| 2800  | 3000  | 2842 | 95  | -0.80985596 | -0.81769013 | yes |
| 3000  | 3200  | 30   | 8   | 1.54293092  | 1.54334262  | yes |
| 3200  | 3300  | 1859 | 82  | -0.52143075 | -0.52512969 | yes |
| 3300  | 3400  | 150  | 15  | 0.35730726  | 0.35760238  | no  |
| 3400  | 3500  | 318  | 69  | 1.27118544  | 1.27444328  | yes |
| 3500  | 3600  | 136  | 22  | 0.90937584  | 0.91023642  | yes |
| 3600  | 3700  | 362  | 27  | 0.03623817  | 0.03630115  | no  |
| 3700  | 3800  | 209  | 21  | 0.36261231  | 0.36303071  | no  |
| 3800  | 4000  | 152  | 30  | 1.15170817  | 1.15305239  | yes |
| 4000  | 4400  | 516  | 61  | 0.54510828  | 0.54679084  | yes |
| 4400  | 4500  | 81   | 7   | 0.19637689  | 0.19645859  | no  |
| 4500  | 4800  | 536  | 60  | 0.48345854  | 0.48496835  | yes |
| 4800  | 5000  | 226  | 42  | 1.07726569  | 1.07908137  | yes |
| 5000  | 5100  | 49   | 6   | 0.58509119  | 0.58526514  | no  |
| 5100  | 5400  | 5990 | 318 | -0.32671385 | -0.33495869 | yes |
| 5400  | 5500  | 1    | 0   | 0           | 0           | ~   |
| 5500  | 5800  | 260  | 43  | 0.93583459  | 0.93754788  | yes |
| 5800  | 6000  | 1158 | 81  | -0.03295369 | -0.03313222 | no  |
| 6000  | 6100  | 47   | 7   | 0.81156253  | 0.8118172   | yes |
| 6100  | 6600  | 297  | 99  | 1.86138465  | 1.86687598  | yes |
| 6600  | 6700  | 818  | 30  | -0.71376888 | -0.71581976 | yes |
| 6700  | 6800  | 166  | 12  | 0.00248588  | 0.00248783  | no  |
| 6800  | 6900  | 31   | 4   | 0.64498933  | 0.64511376  | no  |
| 6900  | 7300  | 49   | 1   | -1.31666918 | -1.3168479  | no  |
| 7300  | 7500  | 595  | 79  | 0.67787292  | 0.68042767  | yes |
| 7500  | 7600  | 166  | 8   | -0.42862166 | -0.42890197 | no  |
| 7600  | 8100  | 4    | 0   | 0           | 0           | ~   |
| 8100  | 8600  | 1083 | 42  | -0.65573562 | -0.65829223 | yes |
| 8600  | 9000  | 103  | 2   | -1.3674415  | -1.36782444 | no  |
| 9000  | 9300  | 758  | 100 | 0.67049709  | 0.67370964  | yes |
| 9300  | 9400  | 8    | 0   | 0           | 0           | ~   |
| 9400  | 9700  | 113  | 9   | 0.10736551  | 0.10742549  | no  |
| 9700  | 10300 | 1330 | 37  | -0.99927063 | -1.00344456 | yes |
| 10300 | 11900 | 304  | 4   | -1.76295628 | -1.76422147 | yes |
| 11900 | 12400 | 917  | 154 | 0.9542264   | 0.96046594  | yes |
| 12400 | 13100 | 27   | 1   | -0.70356471 | -0.70363151 | no  |
| 13100 | 14000 | 7    | 0   | 0           | 0           | ~   |
| 14000 | 14200 | 35   | 5   | 0.76277236  | 0.76294699  | no  |

|             |                                     |             |             |             |              |     |
|-------------|-------------------------------------|-------------|-------------|-------------|--------------|-----|
| 14200       | 14400                               | 11          | 2           | 1.05045444  | 1.05053953   | no  |
| 14400       | 14700                               | 364         | 29          | 0.10769713  | 0.10789122   | no  |
| 14700       | 15100                               | 55          | 0           | 0           | 0            | ~   |
| 15100       | 15300                               | 102         | 15          | 0.79667391  | 0.7972133    | yes |
| 15300       | 15700                               | 3           | 1           | 1.86138465  | 1.86143991   | no  |
| 15700       | 16400                               | 1627        | 15          | -2.12264889 | -2.12989927  | yes |
| 16400       | 19300                               | 1           | 0           | 0           | 0            | ~   |
| 19300       | 20800                               | 3199        | 126         | -0.63959582 | -0.64706975  | yes |
| 20800       | 21300                               | 396         | 24          | -0.18630819 | -0.18663035  | no  |
| 21300       | 22800                               | 461         | 108         | 1.370195    | 1.37548981   | yes |
| 22800       | 26600                               | 2477        | 76          | -0.89837542 | -0.90567672  | yes |
| 26600       | 26900                               | 72          | 1           | -1.70814804 | -1.70844378  | no  |
| 26900       | 29100                               | 78          | 12          | 0.84978374  | 0.85023351   | yes |
| 29100       | 30900                               | 7217        | 695         | -0.03844904 | -0.03868646  | no  |
| 30900       | 32600                               | 5           | 2           | 2.14906672  | 2.14918234   | yes |
|             |                                     | 217798      | 15886       |             |              |     |
|             |                                     |             |             |             |              |     |
| Transition: | Tropical Dry Forests to Agriculture |             |             | Variable:   | Population   |     |
|             |                                     | Possible    | Executed    | Weight      |              |     |
| Range       | Transitions                         | Transitions | Coefficient | Contrast    | Significant? |     |
| 0           | 10000                               | 67749       | 3165        | -0.24028376 | -0.4219821   | yes |
| 10000       | 20000                               | 31051       | 2629        | 0.39496994  | 0.53493623   | yes |
| 20000       | 30000                               | 37837       | 2295        | 0.03554764  | 0.04872137   | no  |
| 30000       | 40000                               | 5519        | 250         | -0.27260506 | -0.28233769  | yes |
|             |                                     | 142156      | 8339        |             |              |     |
|             |                                     |             |             |             |              |     |
| Transition: | Tropical Dry Forests to Agriculture |             |             | Variable:   | Slope        |     |
|             |                                     | Possible    | Executed    | Weight      |              |     |
| Range       | Transitions                         | Transitions | Coefficient | Contrast    | Significant? |     |
| 0           | 2                                   | 45764       | 4164        | 0.24133793  | 0.31483676   | yes |
| 2           | 4                                   | 19777       | 2311        | 0.52038614  | 0.58724452   | yes |
| 4           | 10                                  | 49366       | 4744        | 0.30161559  | 0.406887     | yes |
| 10          | 12                                  | 16941       | 1084        | -0.1399912  | -0.15106779  | yes |
| 12          | 16                                  | 32623       | 1713        | -0.34987159 | -0.40188266  | yes |
| 16          | 20                                  | 25934       | 1087        | -0.58635347 | -0.64677334  | yes |
| 20          | 24                                  | 15487       | 531         | -0.79514387 | -0.83810291  | yes |
| 24          | 26                                  | 4408        | 113         | -1.09485707 | -1.10922103  | yes |
| 26          | 32                                  | 5845        | 103         | -1.47787193 | -1.50022231  | yes |
| 32          | 54                                  | 1653        | 36          | -1.75270246 | -1.75904262  | yes |
|             |                                     | 217798      | 15886       |             |              |     |
|             |                                     |             |             |             |              |     |

| Transition: | Tropical Dry Forests to Agriculture |             |             | Variable:   | Soils                 |     |
|-------------|-------------------------------------|-------------|-------------|-------------|-----------------------|-----|
|             |                                     | Possible    | Executed    | Weight      |                       |     |
| Range       | Transitions                         | Transitions | Coefficient | Contrast    | Significant?          |     |
|             | Solonchak                           | 1112        | 67          | -0.2046858  | -0.2056483            | no  |
|             | Vertisol                            | 11479       | 1685        | 0.78238935  | 0.84479299            | yes |
|             | Litosol                             | 48196       | 1830        | -0.68985672 | -0.82835831           | yes |
|             | Regosol                             | 65332       | 4493        | -0.06331666 | -0.08943205           | yes |
|             | Fluvisol                            | 362         | 26          | -0.01662088 | -0.01664836           | no  |
|             | Tfeozem                             | 23528       | 2154        | 0.24754509  | 0.28136375            | yes |
|             | Xerosol                             | 1393        | 158         | 0.48616252  | 0.49002287            | yes |
|             | Yermosol                            | 561         | 60          | 0.4201322   | 0.4214319             | yes |
|             | Planosol                            | 24708       | 2453        | 0.3371388   | 0.38808017            | yes |
|             | Cambisol                            | 24495       | 1660        | -0.0790831  | -0.08873224           | yes |
|             | Rendzina                            | 885         | 64          | -0.00924629 | -0.00928386           | no  |
|             | Castagnozem                         | 1457        | 182         | 0.59569897  | 0.60088708            | yes |
|             | Acrisol                             | 13427       | 1017        | 0.04074826  | 0.04347559            | no  |
|             | Luvisol                             | 115         | 7           | -0.19382734 | -0.19392163           | no  |
|             | Gleysol                             | 25          | 0           | 0           | 0                     | ~   |
|             | Chernozem                           | 712         | 29          | 0.37743003  | 0.37784607            | no  |
|             | Andosol                             | 0           | 0           | 0           | 0                     | ~   |
|             | Nitosol                             | 11          | 1           | 0.23980865  | 0.23982207            | no  |
|             | Solonetz                            | 0           | 0           | 0           | 0                     | ~   |
|             |                                     | 217798      | 15886       |             |                       |     |
|             |                                     |             |             |             |                       |     |
| Transition: | Tropical Dry Forests to Agriculture |             |             | Variable:   | Seasonality           |     |
|             |                                     | Possible    | Executed    | Weight      |                       |     |
| Range       | Transitions                         | Transitions | Coefficient | Contrast    | Significant?          |     |
| 0           | 1000                                | 11394       | 1784        | 0.85844755  | 0.92880423            | yes |
| 1000        | 2000                                | 70659       | 6353        | 0.22766794  | 0.35490927            | yes |
| 2000        | 4000                                | 86141       | 6527        | 0.0411512   | 0.06887971            | yes |
| 4000        | 5000                                | 20136       | 737         | -0.72799516 | -0.78150202           | yes |
| 5000        | 6000                                | 22338       | 468         | -1.30200908 | -1.38674832           | yes |
| 6000        | 7000                                | 7112        | 17          | -3.4915385  | -3.52623911           | yes |
| 7000        | 8000                                | 18          | 0           | 0           | 0                     | ~   |
|             |                                     | 217798      | 15886       |             |                       |     |
|             |                                     |             |             |             |                       |     |
| Transition: | Natural Grasslands to Agriculture   |             |             | Variable:   | Index_marginalization |     |
|             |                                     | Possible    | Executed    | Weight      |                       |     |
| Range       | Transitions                         | Transitions | Coefficient | Contrast    | Significant?          |     |
|             | 1                                   | 42734       | 861         | -0.89935616 | -1.19310016           | yes |
|             | 2                                   | 41320       | 2333        | 0.16887258  | 0.26851118            | yes |

|             |                                   |             |             |             |                         |     |
|-------------|-----------------------------------|-------------|-------------|-------------|-------------------------|-----|
|             | 3                                 | 25393       | 1647        | 0.3164872   | 0.41883826              | yes |
|             | 4                                 | 9765        | 836         | 0.61651477  | 0.69125957              | yes |
|             | 5                                 | 1198        | 116         | 0.75196957  | 0.76271197              | yes |
|             |                                   | 120410      | 5793        |             |                         |     |
|             |                                   |             |             |             |                         |     |
| Transition: | Natural Grasslands to Agriculture |             |             | Variable:   | Potected_Areas_distance |     |
|             |                                   | Possible    | Executed    | Weight      |                         |     |
| Range       | Transitions                       | Transitions | Coefficient | Contrast    | Significant?            |     |
| 0           | 1000                              | 650         | 17          | -0.63231123 | -0.63491039             | yes |
| 1000        | 2000                              | 243         | 9           | -0.27315069 | -0.27363956             | no  |
| 2000        | 3000                              | 277         | 15          | 0.12465154  | 0.12495574              | no  |
| 3000        | 7000                              | 1244        | 82          | 0.33376715  | 0.33783345              | yes |
| 7000        | 8000                              | 359         | 35          | 0.75955039  | 0.76277968              | yes |
| 8000        | 10000                             | 697         | 91          | 1.08892536  | 1.09945746              | yes |
| 10000       | 20000                             | 3681        | 365         | 0.77832868  | 0.81405034              | yes |
| 20000       | 177000                            | 51101       | 4135        | 0.55500924  | 1.27881347              | yes |
| 177000      | 178000                            | 278         | 4           | -1.2418879  | -1.24359061             | yes |
| 178000      | 179000                            | 307         | 1           | -2.73863926 | -2.74113995             | yes |
| 179000      | 180000                            | 314         | 3           | -1.65623478 | -1.65843385             | yes |
| 180000      | 181000                            | 308         | 5           | -1.11934905 | -1.12113265             | yes |
| 181000      | 182000                            | 329         | 4           | -1.41258498 | -1.41473381             | yes |
| 182000      | 183000                            | 368         | 3           | -1.81633922 | -1.81901082             | yes |
| 183000      | 184000                            | 360         | 6           | -1.0925916  | -1.09464866             | yes |
| 184000      | 185000                            | 332         | 1           | -2.81717253 | -2.81989195             | yes |
| 185000      | 186000                            | 350         | 7           | -0.90687445 | -0.90866243             | yes |
| 186000      | 188000                            | 709         | 9           | -1.36890991 | -1.37348113             | yes |
| 188000      | 192000                            | 1388        | 27          | -0.93519229 | -0.94246599             | yes |
| 192000      | 193000                            | 324         | 9           | -0.57040222 | -0.57159948             | no  |
| 193000      | 194000                            | 327         | 13          | -0.19949779 | -0.19999449             | no  |
| 194000      | 195000                            | 303         | 17          | 0.16216738  | 0.16260788              | no  |
| 195000      | 202000                            | 2029        | 85          | -0.14490589 | -0.14723061             | no  |
| 202000      | 203000                            | 271         | 1           | -2.61347612 | -2.61566193             | yes |
| 203000      | 208000                            | 1508        | 12          | -1.84069767 | -1.85176214             | yes |
| 208000      | 209000                            | 326         | 5           | -1.17705737 | -1.17899844             | yes |
| 209000      | 210000                            | 318         | 3           | -1.66901451 | -1.67124857             | yes |
| 210000      | 213000                            | 973         | 13          | -1.31703808 | -1.32320247             | yes |
| 213000      | 215000                            | 593         | 5           | -1.78234319 | -1.78662304             | yes |
| 215000      | 219000                            | 1118        | 14          | -1.38269205 | -1.38995119             | yes |
| 219000      | 222000                            | 937         | 16          | -1.06792547 | -1.07322761             | yes |
| 222000      | 223000                            | 320         | 1           | -2.78024526 | -2.78285969             | yes |
| 223000      | 224000                            | 325         | 3           | -1.69099341 | -1.69328872             | yes |



|        |        |      |     |             |             |     |
|--------|--------|------|-----|-------------|-------------|-----|
| 224000 | 233000 | 3014 | 43  | -1.25050792 | -1.26932046 | yes |
| 233000 | 234000 | 293  | 15  | 0.06537493  | 0.06553921  | no  |
| 234000 | 235000 | 298  | 11  | -0.2766411  | -0.27724758 | no  |
| 235000 | 236000 | 312  | 7   | -0.78945578 | -0.79091128 | yes |
| 236000 | 237000 | 318  | 10  | -0.44256885 | -0.44353196 | no  |
| 237000 | 240000 | 1076 | 24  | -0.79544872 | -0.80051796 | yes |
| 240000 | 241000 | 382  | 3   | -1.85397807 | -1.85677222 | yes |
| 241000 | 242000 | 428  | 7   | -1.11177684 | -1.11424762 | yes |
| 242000 | 244000 | 858  | 18  | -0.85808429 | -0.862328   | yes |
| 244000 | 245000 | 467  | 7   | -1.2003705  | -1.20318285 | yes |
| 245000 | 246000 | 442  | 9   | -0.88856731 | -0.89079745 | yes |
| 246000 | 248000 | 948  | 27  | -0.54467733 | -0.54807355 | yes |
| 248000 | 249000 | 438  | 16  | -0.28747075 | -0.2883936  | no  |
| 249000 | 250000 | 421  | 11  | -0.63331604 | -0.63499894 | yes |
| 250000 | 265000 | 6608 | 141 | -0.84076187 | -0.87419802 | yes |
| 265000 | 266000 | 423  | 3   | -1.95669658 | -1.95984969 | yes |
| 266000 | 268000 | 815  | 11  | -1.30675815 | -1.31189689 | yes |
| 268000 | 269000 | 449  | 3   | -2.01676082 | -2.02014163 | yes |
| 269000 | 270000 | 437  | 8   | -0.99706953 | -0.99943753 | yes |
| 270000 | 271000 | 440  | 3   | -1.99637506 | -1.99967705 | yes |
| 271000 | 272000 | 453  | 6   | -1.32585328 | -1.32872458 | yes |
| 272000 | 283000 | 4490 | 79  | -1.037463   | -1.06297681 | yes |
| 283000 | 284000 | 388  | 11  | -0.54940407 | -0.55079806 | no  |
| 284000 | 285000 | 404  | 6   | -1.20974669 | -1.2121889  | yes |
| 285000 | 289000 | 1554 | 36  | -0.75668418 | -0.76378298 | yes |
| 289000 | 290000 | 362  | 12  | -0.38808066 | -0.38906537 | no  |
| 290000 | 292000 | 750  | 13  | -1.05269269 | -1.05689696 | yes |
| 292000 | 293000 | 407  | 9   | -0.80428158 | -0.80620525 | yes |
| 293000 | 295000 | 775  | 12  | -1.16740554 | -1.17201113 | yes |
| 295000 | 296000 | 372  | 9   | -0.71223241 | -0.7138497  | yes |
| 296000 | 298000 | 772  | 28  | -0.29489068 | -0.29655789 | no  |
| 298000 | 300000 | 729  | 19  | -0.63588015 | -0.63880875 | yes |
| 300000 | 307000 | 2457 | 52  | -0.84911562 | -0.86130494 | yes |
| 307000 | 308000 | 341  | 4   | -1.44884273 | -1.45109656 | yes |
| 308000 | 311000 | 979  | 7   | -1.94849981 | -1.95580731 | yes |
| 311000 | 312000 | 341  | 1   | -2.84399977 | -2.84679795 | yes |
| 312000 | 313000 | 301  | 4   | -1.32249193 | -1.32439581 | yes |
| 313000 | 314000 | 293  | 2   | -1.99523024 | -1.99742706 | yes |
| 314000 | 315000 | 285  | 0   | 0           | 0           | ~   |
| 315000 | 375000 | 9660 | 40  | -2.49777425 | -2.57850977 | yes |
| 375000 | 376000 | 110  | 4   | -0.29219889 | -0.29243341 | no  |

|                    |                                          |                    |                    |                  |                        |     |
|--------------------|------------------------------------------|--------------------|--------------------|------------------|------------------------|-----|
| 376000             | 377000                                   | 100                | 2                  | -0.90687445      | -0.90738454            | no  |
| 377000             | 378000                                   | 102                | 1                  | -1.63017467      | -1.63088362            | no  |
| 378000             | 379000                                   | 93                 | 3                  | -0.41625154      | -0.41651907            | no  |
| 379000             | 383000                                   | 320                | 7                  | -0.8153472       | -0.81687268            | yes |
| 383000             | 384000                                   | 71                 | 2                  | -0.55601348      | -0.55627036            | no  |
| 384000             | 394000                                   | 843                | 18                 | -0.84006579      | -0.84417766            | yes |
| 394000             | 395000                                   | 74                 | 0                  | 0                | 0                      | ~   |
| 395000             | 401000                                   | 395                | 2                  | -2.29571659      | -2.29880599            | yes |
| 401000             | 402000                                   | 51                 | 0                  | 0                | 0                      | ~   |
| 402000             | 403000                                   | 39                 | 2                  | 0.06717511       | 0.06719755             | no  |
| 403000             | 404000                                   | 30                 | 2                  | 0.34588851       | 0.3459895              | no  |
| 404000             | 405000                                   | 18                 | 1                  | 0.1517325        | 0.15175681             | no  |
| 405000             | 406000                                   | 15                 | 3                  | 1.59865148       | 1.59906478             | yes |
| 406000             | 407000                                   | 14                 | 0                  | 0                | 0                      | ~   |
| 407000             | 408000                                   | 15                 | 1                  | 0.34588851       | 0.345939               | no  |
| 408000             | 409000                                   | 13                 | 0                  | 0                | 0                      | ~   |
| 409000             | 410000                                   | 11                 | 1                  | 0.68236075       | 0.68244614             | no  |
| 410000             | 411000                                   | 6                  | 0                  | 0                | 0                      | ~   |
| 411000             | 520000                                   | 129                | 1                  | -1.86708442      | -1.86802917            | no  |
| 520000             | 521000                                   | 4                  | 0                  | 0                | 0                      | ~   |
| 521000             | 621000                                   | 10                 | 0                  | 0                | 0                      | ~   |
|                    |                                          | 120410             | 5793               |                  |                        |     |
|                    |                                          |                    |                    |                  |                        |     |
| <b>Transition:</b> | <b>Natural Grasslands to Agriculture</b> |                    |                    | <b>Variable:</b> | <b>distance_cities</b> |     |
|                    |                                          | Possible           | Executed           | Weight           |                        |     |
| <b>Range</b>       | <b>Transitions</b>                       | <b>Transitions</b> | <b>Coefficient</b> | <b>Contrast</b>  | <b>Significant?</b>    |     |
| 0                  | 2000                                     | 815                | 143                | 1.4416517        | 1.46088823             | yes |
| 2000               | 5000                                     | 4844               | 635                | 1.09771004       | 1.17698318             | yes |
| 5000               | 8000                                     | 8708               | 887                | 0.81234269       | 0.90870255             | yes |
| 8000               | 9000                                     | 3470               | 275                | 0.53649414       | 0.55708259             | yes |
| 9000               | 16000                                    | 24967              | 1606               | 0.31174406       | 0.41018387             | yes |
| 16000              | 17000                                    | 3333               | 149                | -0.07288183      | -0.07489007            | no  |
| 17000              | 25000                                    | 23939              | 902                | -0.25117697      | -0.30560468            | yes |
| 25000              | 47000                                    | 31324              | 977                | -0.44690088      | -0.56906728            | yes |
| 47000              | 48000                                    | 858                | 6                  | -1.96676165      | -1.97318812            | yes |
| 48000              | 49000                                    | 935                | 15                 | -1.12725806      | -1.13271871            | yes |
| 49000              | 50000                                    | 890                | 9                  | -1.59476764      | -1.60092813            | yes |
| 50000              | 51000                                    | 874                | 4                  | -2.39313344      | -2.40006557            | yes |
| 51000              | 52000                                    | 801                | 7                  | -1.7421079       | -1.74785053            | yes |
| 52000              | 53000                                    | 757                | 1                  | -3.63897597      | -3.64542616            | yes |
| 53000              | 54000                                    | 752                | 4                  | -2.24204321      | -2.24790238            | yes |

|             |                                   |             |             |             |                |     |
|-------------|-----------------------------------|-------------|-------------|-------------|----------------|-----|
| 54000       | 58000                             | 2508        | 25          | -1.60928155 | -1.62685632    | yes |
| 58000       | 77000                             | 6615        | 97          | -1.21854647 | -1.26017757    | yes |
| 77000       | 79000                             | 372         | 3           | -1.82311895 | -1.82582586    | yes |
| 79000       | 80000                             | 171         | 0           | 0           | 0              | ~   |
| 80000       | 96000                             | 1412        | 7           | -2.31281702 | -2.32394698    | yes |
| 96000       | 97000                             | 64          | 2           | -0.4449218  | -0.44511632    | no  |
| 97000       | 98000                             | 66          | 1           | -1.18532186 | -1.18571613    | no  |
| 98000       | 99000                             | 53          | 0           | 0           | 0              | ~   |
| 99000       | 119000                            | 782         | 7           | -1.71788747 | -1.72346304    | yes |
| 119000      | 120000                            | 37          | 31          | 0.12686453  | 0.12690588     | no  |
| 120000      | 121000                            | 168         | 0           | 0           | 0              | ~   |
| 121000      | 144000                            | 895         | 0           | 0           | 0              | ~   |
|             |                                   | 120410      | 5793        |             |                |     |
|             |                                   |             |             |             |                |     |
| Transition: | Natural Grasslands to Agriculture |             |             | Variable:   | distance_roads |     |
|             |                                   | Possible    | Executed    | Weight      |                |     |
| Range       | Transitions                       | Transitions | Coefficient | Contrast    | Significant?   |     |
| 0           | 1000                              | 6721        | 804         | 0.98896027  | 1.08537073     | yes |
| 1000        | 2000                              | 13065       | 1227        | 0.71820331  | 0.84720097     | yes |
| 2000        | 3000                              | 12196       | 924         | 0.48358086  | 0.55381935     | yes |
| 3000        | 5000                              | 16010       | 985         | 0.26011672  | 0.30597152     | yes |
| 5000        | 6000                              | 9234        | 414         | -0.07396533 | -0.07989149    | no  |
| 6000        | 7000                              | 5900        | 218         | -0.27561766 | -0.28810444    | yes |
| 7000        | 8000                              | 6426        | 162         | -0.67003206 | -0.69787053    | yes |
| 8000        | 86000                             | 50858       | 1059        | -0.86572399 | -1.23385701    | yes |
|             |                                   | 120410      | 5793        |             |                |     |
|             |                                   |             |             |             |                |     |
| Transition: | Natural Grasslands to Agriculture |             |             | Variable:   | altitude       |     |
|             |                                   | Possible    | Executed    | Weight      |                |     |
| Range       | Transitions                       | Transitions | Coefficient | Contrast    | Significant?   |     |
| 0           | 100                               | 2316        | 370         | 1.32489141  | 1.37376802     | yes |
| 100         | 200                               | 207         | 49          | 1.81414493  | 1.8212599      | yes |
| 200         | 300                               | 691         | 30          | -0.10763679 | -0.10822855    | no  |
| 300         | 400                               | 693         | 13          | -0.97222377 | -0.97592779    | yes |
| 400         | 500                               | 946         | 25          | -0.62166454 | -0.62540778    | yes |
| 500         | 600                               | 518         | 24          | -0.03956202 | -0.03972992    | no  |
| 600         | 1000                              | 1972        | 53          | -0.60434791 | -0.61204174    | yes |
| 1000        | 1100                              | 2826        | 45          | -1.1389837  | -1.15574865    | yes |
| 1100        | 1200                              | 5379        | 691         | 1.07029816  | 1.15555328     | yes |
| 1200        | 1300                              | 8067        | 165         | -0.88400603 | -0.92654622    | yes |
| 1300        | 1900                              | 61568       | 1880        | -0.47293955 | -0.81617674    | yes |

|             |                                   |             |             |             |                              |     |
|-------------|-----------------------------------|-------------|-------------|-------------|------------------------------|-----|
| 1900        | 2000                              | 10335       | 701         | 0.36437377  | 0.40555327                   | yes |
| 2000        | 2200                              | 15631       | 1294        | 0.57981426  | 0.69897579                   | yes |
| 2200        | 2300                              | 4509        | 290         | 0.30744718  | 0.32129896                   | yes |
| 2300        | 2400                              | 2899        | 123         | -0.1316623  | -0.13471969                  | no  |
| 2400        | 2500                              | 1147        | 27          | -0.74032743 | -0.74547573                  | yes |
| 2500        | 2600                              | 304         | 4           | -1.33256844 | -1.33449863                  | yes |
| 2600        | 3700                              | 122         | 1           | -1.81087088 | -1.81175451                  | no  |
| 3700        | 3800                              | 13          | 0           | 0           | 0                            | ~   |
| 3800        | 4900                              | 109         | 0           | 0           | 0                            | ~   |
|             |                                   | 120407      | 5793        |             |                              |     |
|             |                                   |             |             |             |                              |     |
| Transition: | Natural Grasslands to Agriculture |             |             | Variable:   | Potential_evapotranspiration |     |
|             |                                   | Possible    | Executed    | Weight      |                              |     |
| Range       | Transitions                       | Transitions | Coefficient | Contrast    | Significant?                 |     |
| 0           | 1000                              | 394         | 61          | 1.28767722  | 1.29535344                   | yes |
| 1000        | 4000                              | 25812       | 2779        | 0.87010902  | 1.29915166                   | yes |
| 4000        | 5000                              | 35360       | 1542        | -0.10296709 | -0.14310259                  | yes |
| 5000        | 6000                              | 46064       | 1200        | -0.63636829 | -0.90088711                  | yes |
| 6000        | 7000                              | 12339       | 192         | -1.16239629 | -1.24071721                  | yes |
| 7000        | 8000                              | 441         | 19          | -0.11562049 | -0.1160239                   | no  |
|             |                                   | 120410      | 5793        |             |                              |     |
|             |                                   |             |             |             |                              |     |
| Transition: | Natural Grasslands to Agriculture |             |             | Variable:   | GDP                          |     |
|             |                                   | Possible    | Executed    | Weight      |                              |     |
| Range       | Transitions                       | Transitions | Coefficient | Contrast    | Significant?                 |     |
| 0           | 100                               | 9744        | 262         | -0.62373029 | -0.6672337                   | yes |
| 100         | 200                               | 10135       | 350         | -0.36559698 | -0.39551559                  | yes |
| 200         | 400                               | 15006       | 652         | -0.12666362 | -0.14465048                  | yes |
| 400         | 500                               | 13661       | 466         | -0.37833187 | -0.42104362                  | yes |
| 500         | 700                               | 8236        | 402         | -0.00470068 | -0.00506577                  | no  |
| 700         | 800                               | 8659        | 294         | -0.20570532 | -0.2095337                   | no  |
| 800         | 900                               | 3558        | 27          | -1.90842378 | -1.93668537                  | yes |
| 900         | 1000                              | 2841        | 166         | 0.18535888  | 0.1905227                    | yes |
| 1000        | 1100                              | 5549        | 593         | 0.8419159   | 0.90725799                   | yes |
| 1100        | 1200                              | 1986        | 135         | 0.34686921  | 0.35409539                   | yes |
| 1200        | 1300                              | 3673        | 97          | -0.64221341 | -0.65824333                  | yes |
| 1300        | 1400                              | 3866        | 271         | 0.3798953   | 0.39586747                   | yes |
| 1400        | 1500                              | 1188        | 305         | 1.90206232  | 1.94998289                   | yes |
| 1500        | 1600                              | 3976        | 169         | -0.14962229 | -0.15466557                  | no  |
| 1600        | 1700                              | 1280        | 137         | 0.84364501  | 0.85785795                   | yes |
| 1700        | 2000                              | 2713        | 211         | 0.49208819  | 0.50721584                   | yes |

|      |      |      |     |             |             |     |
|------|------|------|-----|-------------|-------------|-----|
| 2000 | 2100 | 1916 | 39  | -0.90879264 | -0.91925272 | yes |
| 2100 | 2200 | 47   | 17  | 2.39709171  | 2.39986027  | yes |
| 2200 | 2300 | 677  | 136 | 1.58431136  | 1.60393566  | yes |
| 2300 | 2400 | 564  | 71  | 1.02724645  | 1.03547026  | yes |
| 2400 | 2500 | 43   | 9   | 1.6359398   | 1.63723725  | yes |
| 2500 | 2600 | 93   | 5   | 0.09717685  | 0.09725973  | no  |
| 2600 | 2700 | 1231 | 118 | 0.72094602  | 0.73196088  | yes |
| 2700 | 2800 | 4342 | 27  | -2.10893999 | -2.1447025  | yes |
| 2800 | 2900 | 113  | 28  | 1.854629    | 1.85886551  | yes |
| 2900 | 3000 | 1348 | 3   | -3.14046125 | -3.1524048  | yes |
| 3000 | 3200 | 9    | 1   | 0.88563421  | 0.88573931  | no  |
| 3200 | 3300 | 360  | 88  | 1.8366105   | 1.8499639   | yes |
| 3300 | 3600 | 1061 | 116 | 0.86748101  | 0.87969453  | yes |
| 3600 | 3700 | 529  | 37  | 0.37751494  | 0.37960749  | yes |
| 3700 | 3800 | 1048 | 2   | -3.29450572 | -3.30384028 | yes |
| 3800 | 4700 | 1588 | 22  | -1.30016167 | -1.31076493 | yes |
| 4700 | 4800 | 1    | 0   | 0           | 0           | ~   |
| 4800 | 4900 | 13   | 1   | 0.4801691   | 0.48023731  | no  |
| 4900 | 5000 | 307  | 4   | -1.3623627  | -1.36444498 | yes |
| 5000 | 5100 | 115  | 6   | 0.06548734  | 0.06555543  | no  |
| 5100 | 5200 | 771  | 4   | -2.29111669 | -2.29749891 | yes |
| 5200 | 5400 | 24   | 2   | 0.56718048  | 0.56733537  | no  |
| 5400 | 5500 | 412  | 61  | 1.21516339  | 1.22289179  | yes |
| 5500 | 5600 | 4    | 0   | 0           | 0           | ~   |
| 5600 | 5800 | 1    | 1   | 0           | 0           | ~   |
| 5800 | 6000 | 12   | 1   | 0.56718048  | 0.56725791  | no  |
| 6000 | 6400 | 306  | 35  | 0.91830499  | 0.92208261  | yes |
| 6400 | 6500 | 78   | 6   | 0.4801691   | 0.48057867  | no  |
| 6500 | 6600 | 187  | 97  | 3.03997706  | 3.05664837  | yes |
| 6600 | 6700 | 406  | 43  | 0.83187303  | 0.83624072  | yes |
| 6700 | 6900 | 38   | 1   | -0.64584216 | -0.64600454 | no  |
| 6900 | 7400 | 7    | 7   | 0           | 0           | ~   |
| 7400 | 7600 | 1009 | 68  | 0.33764031  | 0.34116213  | yes |
| 7600 | 7800 | 1490 | 20  | -1.33220966 | -1.34227416 | yes |
| 7800 | 8100 | 1    | 0   | 0           | 0           | ~   |
| 8100 | 8400 | 1424 | 57  | -0.21224682 | -0.21468525 | no  |
| 8400 | 9000 | 70   | 1   | -1.26903076 | -1.26948836 | no  |
| 9000 | 9400 | 165  | 4   | -0.73003426 | -0.7308043  | no  |
| 9400 | 9600 | 162  | 27  | 1.35563784  | 1.35923307  | yes |
| 9600 | 9700 | 39   | 1   | -0.67251041 | -0.67268201 | no  |
| 9700 | 9800 | 146  | 2   | -1.31159037 | -1.31256135 | no  |

|             |                                   |             |             |             |              |     |
|-------------|-----------------------------------|-------------|-------------|-------------|--------------|-----|
| 9800        | 10100                             | 2           | 0           | 0           | 0            | ~   |
| 10100       | 10600                             | 36          | 5           | 1.14052646  | 1.14113525   | yes |
| 10600       | 11800                             | 336         | 35          | 0.81331355  | 0.8168138    | yes |
| 11800       | 11900                             | 25          | 4           | 1.30684767  | 1.3073697    | yes |
| 11900       | 12400                             | 35          | 1           | -0.56128478 | -0.56141948  | no  |
| 12400       | 12800                             | 10          | 6           | 3.37054086  | 3.3715777    | yes |
| 12800       | 13900                             | 643         | 0           | 0           | 0            | ~   |
| 13900       | 15300                             | 73          | 7           | 0.72133116  | 0.72197516   | no  |
| 15300       | 16300                             | 733         | 2           | -2.93619053 | -2.94259638  | yes |
| 16300       | 20800                             | 56          | 1           | -1.04225744 | -1.04258586  | no  |
| 20800       | 21300                             | 28          | 3           | 0.84481221  | 0.84511837   | no  |
| 21300       | 21900                             | 106         | 2           | -0.98616797 | -0.98676967  | no  |
| 21900       | 26800                             | 7           | 0           | 0           | 0            | ~   |
| 26800       | 28500                             | 23          | 1           | -0.1259667  | -0.12599072  | no  |
| 28500       | 29100                             | 69          | 21          | 2.13839718  | 2.14171756   | yes |
|             |                                   | 120410      | 5793        |             |              |     |
|             |                                   |             |             |             |              |     |
| Transition: | Natural Grasslands to Agriculture |             |             | Variable:   | Slope        |     |
|             |                                   | Possible    | Executed    | Weight      |              |     |
| Range       | Transitions                       | Transitions | Coefficient | Contrast    | Significant? |     |
| 0           | 2                                 | 43363       | 3437        | 0.53254141  | 1.0041625    | yes |
| 2           | 4                                 | 22007       | 1306        | 0.22175717  | 0.27804532   | yes |
| 4           | 6                                 | 14964       | 499         | -0.38191097 | -0.42674704  | yes |
| 6           | 8                                 | 10725       | 216         | -0.89973875 | -0.95791506  | yes |
| 8           | 10                                | 8143        | 124         | -1.18431729 | -1.2352185   | yes |
| 10          | 22                                | 20091       | 206         | -1.58487464 | -1.73923587  | yes |
| 22          | 24                                | 606         | 3           | -2.31833476 | -2.32309234  | yes |
| 24          | 36                                | 511         | 2           | -3.21350857 | -3.21763834  | yes |
|             |                                   | 120410      | 5793        |             |              |     |
|             |                                   |             |             |             |              |     |
| Transition: | Natural Grasslands to Agriculture |             |             | Variable:   | Soils        |     |
|             |                                   | Possible    | Executed    | Weight      |              |     |
| Range       | Transitions                       | Transitions | Coefficient | Contrast    | Significant? |     |
|             | Solonchak                         | 2612        | 44          | -1.08174719 | -1.09678268  | yes |
|             | Vertisol                          | 2585        | 209         | 0.55410641  | 0.56990355   | yes |
|             | Litosol                           | 17172       | 161         | -1.67526526 | -1.80773676  | yes |
|             | Regosol                           | 22574       | 445         | -0.92162412 | -1.05621372  | yes |
|             | Fluvisol                          | 59          | 2           | -0.36495824 | -0.36511037  | no  |
|             | Tfeozem                           | 21100       | 1330        | 0.28595915  | 0.35745719   | yes |
|             | Xerosol                           | 26556       | 1547        | 0.20202765  | 0.26654905   | yes |
|             | Yermosol                          | 3796        | 255         | 0.35404494  | 0.36768032   | yes |

|             |                                   |             |             |             |              |     |
|-------------|-----------------------------------|-------------|-------------|-------------|--------------|-----|
|             | Planosol                          | 3270        | 544         | 1.37330448  | 1.44784624   | yes |
|             | Cambisol                          | 4764        | 410         | 0.62225276  | 0.6569295    | yes |
|             | Rendzina                          | 7397        | 132         | -1.02307581 | -1.06550905  | yes |
|             | Castagnozem                       | 3767        | 294         | 0.51575156  | 0.53706611   | yes |
|             | Acrisol                           | 326         | 68          | 1.4957941   | 1.50388197   | yes |
|             | Luvisol                           | 2096        | 235         | 1.04758275  | 1.0746625    | yes |
|             | Gleysol                           | 928         | 61          | 0.33078073  | 0.33377344   | yes |
|             | Chernozem                         | 459         | 26          | 0.17230465  | 0.17301798   | no  |
|             | Andosol                           | 37          | 0           | 0           | 0            | ~   |
|             | Nitosol                           | 4           | 0           | 0           | 0            | ~   |
|             | Solonetz                          | 7           | 0           | 0           | 0            | ~   |
|             | Ranker                            | 901         | 30          | -0.38349875 | -0.38593488  | yes |
|             |                                   | 120410      | 5793        |             |              |     |
|             |                                   |             |             |             |              |     |
| Transition: | Natural Grasslands to Agriculture |             |             | Variable:   | seasonality  |     |
|             |                                   | Possible    | Executed    | Weight      |              |     |
| Range       | Transitions                       | Transitions | Coefficient | Contrast    | Significant? |     |
| 0           | 1000                              | 649         | 134         | 1.63861874  | 1.65751849   | yes |
| 1000        | 2000                              | 2422        | 288         | 0.98215289  | 1.01435238   | yes |
| 2000        | 5000                              | 46786       | 3475        | 0.46213368  | 0.90346357   | yes |
| 5000        | 6000                              | 19381       | 1203        | 0.26955221  | 0.32963703   | yes |
| 6000        | 7000                              | 39192       | 498         | -1.36789391 | -1.68988306  | yes |
| 7000        | 8000                              | 10809       | 195         | -1.01198376 | -1.07491925  | yes |
| 8000        | 9000                              | 1171        | 0           | 0           | 0            | ~   |
|             |                                   | 120410      | 5793        |             |              |     |
